# 1 **Trophoblast and blood vessel organoid cultures recapitulate** 2 **the role of WNT2B in promoting intravillous vascularization in** 3 **human intrauterine and ectopic pregnancy**

4

5 Xiaoya Zhao<sup>1,2#</sup>, Zhenwu Zhang<sup>3#</sup>, Yurui Luo<sup>3</sup>, Qinying Ye<sup>3</sup>, Shuxiang Shi<sup>3</sup>,  
6 Xueyang He<sup>4</sup>, Jing Zhu<sup>4</sup>, Qian Zhu<sup>1,2</sup>, Duo Zhang<sup>1,2</sup>, Wei Xia<sup>1,2</sup>, Yiqin Zhang<sup>1,2</sup>,  
7 Linlin Jiang<sup>3</sup>, Long Cui<sup>5</sup>, Yinghui Ye<sup>5</sup>, Yangfei Xiang<sup>3</sup>, Junhao Hu<sup>4</sup>, Jian  
8 Zhang<sup>1,2\*</sup>, Chao-Po Lin<sup>3\*</sup>

9

10 <sup>1</sup> Department of Obstetrics and Gynecology, International Peace Maternity  
11 and Child Health Hospital, School of Medicine, Shanghai Jiaotong University,  
12 No. 910, Hengshan Rd, Shanghai, 200030, China

13 <sup>2</sup> Shanghai Municipal Key Clinical Specialty, Shanghai, China

14 <sup>3</sup> School of Life Science and Technology, ShanghaiTech University, Shanghai,  
15 201210, China

16 <sup>4</sup> Interdisciplinary Research Center on Biology and Chemistry, Shanghai  
17 Institute of Organic Chemistry, Chinese Academy of Sciences, Shanghai,  
18 201210, China

19 <sup>5</sup> Department of Reproductive Endocrinology, Women's Hospital, Zhejiang  
20 University School of Medicine, Hangzhou, 310000, China.

21

22 X.Z. and Z.Z. contributed equally to this study.

23

24

25 Correspondence:

26 Jian Zhang, Department of Obstetrics and Gynecology, International Peace  
27 Maternity and Child Health Hospital, School of Medicine, Shanghai Jiao Tong  
28 University, Shanghai, China.

29 Email: [zhangjian\\_ipmch@sjtu.edu.cn](mailto:zhangjian_ipmch@sjtu.edu.cn)

30 Chao-Po Lin, School of Life Science and Technology, ShanghaiTech

31 University, 393 Middle Huaxia Road, Pudong, Shanghai, 201210, China. Email:

32 [linzhib@shanghaitech.edu.cn](mailto:linzhib@shanghaitech.edu.cn)

33

34

## 35 **Summary**

36 Tubal ectopic pregnancy (TEP), a pregnancy complication caused by aberrant  
 37 implantation in fallopian tubes, accounts for 9-13% pregnancy-related deaths.  
 38 The lack of models for human TEP hampers the understanding of its  
 39 pathological mechanisms. Here, we employed multiple models to investigate  
 40 the crosstalk between human trophoblast development and intravillous  
 41 vascularization. We found that the severity of TEP, the size of placental villi,  
 42 and the depth of trophoblast invasion are correlated with the extent of  
 43 intravillous vascularization. We identified a key pro-angiogenic factor secreted  
 44 by trophoblasts, WNT2B, that promotes villous vasculogenesis, angiogenesis,  
 45 and vascular network expansion. In an organoid coculture model consisting of  
 46 trophoblast organoids and blood vessel organoids, knockdown of WNT2B in  
 47 trophoblast organoids compromises their pro-angiogenic effect on the  
 48 development of blood vessel organoids. These organoid-based models reveal  
 49 an important role for WNT-mediated angiogenesis in pregnancies and could  
 50 be employed to investigate the communications between trophoblasts and  
 51 endothelial/endothelial progenitor cells.

52

53

54

## 55 **Keywords:**

56 Trophoblast organoid, blood vessel organoid, angiogenesis, ectopic  
 57 pregnancy, WNT signaling

58

## 59 Introduction

60 Ectopic pregnancies (EP) occur when embryos implant at sites other than  
 61 uterine endometria (intrauterine pregnancies, IP), with 98% of EP located in  
 62 the fallopian tubes, while others can occur in the ovaries or abdominal cavities  
 63 (Marion and Meeks, 2012). The incidence of EP is approximately 2% of all  
 64 reported pregnancies, although the actual rate could be higher due to  
 65 misdiagnoses (Bronson, 2018; Farquhar, 2005). Despite substantial  
 66 improvements in diagnosis and management, EP remains a significant cause  
 67 of maternal morbidity and mortality in early pregnancies, accounting for 9-13%  
 68 of all pregnancy-related deaths (Farquhar, 2005). Tubal EPs (TEP) can be  
 69 further classified into two major types: abortive or ruptured ectopic  
 70 pregnancies (hereafter AEP and REP, respectively) (Caspi and Sherman,  
 71 1987). These two forms can be diagnosed or confirmed by human chorionic  
 72 gonadotropin (hCG) levels, transabdominal ultrasonography, and laparoscopy  
 73 (Alkatout et al., 2013; Doubilet et al., 2014). AEPs are frequently characterized  
 74 by low and continuously decreasing hCG levels and hemodynamic stability of  
 75 unruptured fallopian tubes (2013). In contrast, REPs are accompanied with  
 76 high and continuously increasing hCG levels (>3000-5000 IU/L), active fetal  
 77 hearts, and maternal hemodynamic instability. Several risk factors of EPs have  
 78 been reported (Farquhar, 2005; Fukami et al., 2016; Hendriks et al., 2020;  
 79 Marion and Meeks, 2012). However, whether these factors share a causal  
 80 relationship with REP has not yet been substantiated, reflecting a lack of  
 81 understanding regarding the mechanism(s) underlying the distinct pathologies  
 82 of AEP and REP.

83 Analogous to the extensive trophoblast invasion into fallopian tube walls in  
 84 REP, trophoblasts invade deeply into uterine decidua in IP during the first  
 85 trimester, reaching as far as the myometrium, and remodel the decidual  
 86 vasculature to increase the maternal blood supply (Hemberger et al., 2020;



87 Sato, 2020). Invading trophoblast cells differentiate into the outer layer  
88 syncytiotrophoblasts (STBs) and inner layer villous cytotrophoblasts (vCTBs,  
89 the stem cell population in trophoblasts), thus forming primary villi (Sato, 2020).  
90 After day 15 post conception (p.c.), extraembryonic mesoderm cells migrate  
91 into primary villi to form the stromal centers of secondary villi (Sato, 2020).  
92 Between day 18 and 20 p.c., those mesenchymal cells differentiate into  
93 endothelial cells (ECs), forming fetal capillaries, which are hallmarks of tertiary  
94 villi development (Sato, 2020). The developed placental villi form the fetal side  
95 of the maternal-fetal interface which functions as a barrier between maternal  
96 and fetal blood while also allowing the exchange of gas, nutrients, and waste  
97 between the mother and the fetus (Hemberger et al., 2020).

98 Vasculogenesis, angiogenesis, and vascular network development in  
99 placental villi are crucial for establishing a viable pregnancy (Kaufmann et al.,  
100 2004; Wang and Zhao, 2010). Villous vasculogenesis refers to the  
101 differentiation of multipotent mesenchymal cells into hemangioblastic  
102 progenitor cells, which ultimately form *de novo* primitive capillary networks  
103 (Kaufmann et al., 2004; Wang and Zhao, 2010). In the following stage, villous  
104 angiogenesis, placental capillary networks form via sprouting and elongation  
105 of preexisting blood vessels in villous trees (Kaufmann et al., 2004).  
106 Considering the importance of circulation in the functional maternal-fetal  
107 interface, it is unsurprising that abnormalities in the placental vascular bed  
108 underpin a variety of pregnancy complications, including placental  
109 chorangiosis, spontaneous miscarriage, preeclampsia, gestation diabetes, and  
110 intrauterine growth restriction (Barut et al., 2012; Santa et al., 2015; Soma et  
111 al., 2013; Verlohren and Dröge, 2020). Aberrant expression of several  
112 pro-angiogenic factors, such as VEGF (vascular endothelial growth factor),  
113 PlGF (placental growth factor), sFlt-1 (soluble fms-like tyrosine kinase 1),  
114 fibroblast growth factors (FGF), and angiopoietins (ANG), is associated with

115 placental vascular dysfunction and pregnancy complications (Plaisier et al.,  
116 2007; Sherer and Abulafia, 2001). Hence, abnormalities in vasculogenesis and  
117 angiogenesis can impact the function of trophoblasts, the depth of  
118 trophoblastic invasion, as well as the growth of the embryonic and  
119 extraembryonic fetal tissues.

120 Investigations on the communications between trophoblasts and  
121 endothelial cells/endothelial progenitor cells in human are largely hampered by  
122 the lack of proper cell culture models and by the differences between species  
123 (*i.e.*, structural differences of placentas between rodents and primates, as well  
124 as the absence/rarity of EP phenotypes in rodents (Benirschke et al., 2012;  
125 Corpa, 2006; Furukawa et al., 2014)). In this study, by combining multiple  
126 vasculogenesis/angiogenesis analyses and blood vessel/trophoblast organoid  
127 cultures, we found that secreted factors from placental villi or trophoblast  
128 organoids promote vasculogenesis and angiogenesis in IP and REP  
129 conditions. This pro-vasculogenic/angiogenic effect is likely mediated by  
130 trophoblast-secreted WNT2B which promotes the differentiation of endothelial  
131 cells, activates VEGF, and vascular network development to support fetal  
132 growth. Collectively, our models and results identify the WNT signaling as a  
133 mediator of vasculogenesis, angiogenesis, and network formation during early  
134 pregnancy, thus shedding light on intricate interactions between trophoblasts  
135 and villous endothelial cells/endothelial progenitor cells, suggesting its use a  
136 diagnostic marker and a potential therapeutic target for TEP interventions.

137

## 138 **Results**

### 139 **Morphological and immunological similarity between TEP and IP** 140 **placental villi**

141 In IP and TEP conditions, embryos implant and develop in the  
142 decidualized uterine endometrium and the fallopian tube wall, respectively.  
143 Since only the decidualized endometrium has adequate physical space, blood  
144 supply, and the appropriate microenvironment to support optimal fetal growth  
145 (Liu et al., 2020; Ng et al., 2020), it is unclear why implanted embryos still  
146 exhibit extensive trophoblast invasion and continuous fetal growth that  
147 together lead to tubal rupture in ectopic pregnancy (REP). We therefore  
148 hypothesized that the maternal-fetal interface associated with REP could  
149 share more similarities with IP than with tubal abortive ectopic pregnancy  
150 (AEP). To explore this possibility, we selectively collected IP, AEP, and REP  
151 placental villi for further analyses (Figure 1A). All clinical samples were devoid  
152 of medical treatments or obvious risk factors associated with fallopian tubal  
153 abnormalities, e.g., smoking, obvious tubal inflammatory adhesions, previous  
154 fallopian tubal diseases, and history of tubal surgery (Farquhar, 2005; Marion  
155 and Meeks, 2012). No significant differences were found between the three  
156 groups in terms of maternal age, gravity, parity, or gestational days (Figure  
157 S1A).

158 Among the three pregnancy types, hCG levels in the maternal circulating  
159 blood of the IP group was ~5 fold higher ( $47949.79 \pm 6412.00$  IU/L) than that of  
160 the REP group, while REP patients exhibited ~10 fold higher levels  
161 ( $7178.78 \pm 482.50$  IU/L) than that detected in AEP patients ( $858.83 \pm 64.77$  IU/L)  
162 (Figure S1A), in agreement with previous reports that hCG levels are  
163 correlated with tubal rupture (Goksedef et al., 2011). We also compared the  
164 volumes of individual villous trees among the three pregnancy groups and  
165 found that the total volume was obviously greater in the IP group, with more

defined dendritic structures than those from AEP and REP patients (Figure S1B). The total volume of individual villous trees from REP was 2-3 times larger than that of AEP patients (Figure S1B). Notably, same trend was observed in fetus size among groups (Figure S1C). In addition, heart activity was detected in 20/28 REP fetuses, whereas 0/34 AEP fetuses had active hearts, indicating fetal development was more advanced in REP (Figure S1A). Taken together, these observations suggested that at similar gestational ages, REP was accompanied by more extensive embryonic and extraembryonic tissue development than AEP.

175

# **Major differences in vascular systems among IP, AEP, and REP placental villi**

In normal IP, functional vasculature develops in the placental villi in four stages: primary (11-13 days p.c.), secondary (16<sup>th</sup> day-3<sup>rd</sup> wk p.c.), tertiary (3<sup>rd</sup> wk- 4<sup>th</sup> month p.c.), and free villi (> 4<sup>th</sup> month p.c.). At the tertiary stage, the mesenchymal tissue begins to differentiate into endothelial cells (ECs) to form capillaries which, together with trophoblasts, constitute the hemochorial placental barrier (Blundell et al., 2016; Sato, 2020) (Figure 1B). We found that tertiary placental villi from the IP and REP groups appeared to have more capillary-like tubules than those of the AEP group as demonstrated by immunohistochemical staining for CD31 (PECAM) on cross and longitudinal sections of IP, AEP, and REP villi to compare development of the EC layer (Figure 1C-D, and Figure S2A for additional samples). AEP placental villi also contained significantly fewer and smaller capillaries per unit area than REP villi, which shared greater similarity in vascular characteristics with IP (Figure 1C).

To exclude the possibility that CD31 labelled lymphatic tissues rather than blood vessels, we also used an immunohistochemical stain for the lymphatic endothelium marker D2-40 (podoplanin) in IP and TEP villi. We detected no

194 D2-40 signal in placental villi of either IP or TEP, while a strong D2-40 signal  
195 was evident in cervical lymph node positive control samples (Figure S2B),  
196 which indicates that CD31-positive cells in placental villi were exclusively  
197 vascular, not lymphatic, ECs.

198 Since analysis of 2D sections of villous trees can be limited by the integrity  
199 of clinical samples and section regions, we performed tissue clearing on all  
200 three types of placental villi, stained whole-mounts for CK7 and CD31 (Merz et  
201 al., 2018), and compared villi volumes, branching patterns and morphology of  
202 blood vessels. Three dimensional analyses of cleared tissues confirmed that  
203 AEP placental villi exhibited compromised vascular systems, *e.g.*, lower  
204 number of branches, vessel diameter, and volume of blood vessels, compared  
205 with IP villi collected at the same gestational stage (Figure 1E-F, Figure S2C  
206 for additional samples, and Video S1-6). In line with our findings above, the  
207 vascular structure of REP placental villi more closely resembled those of IP  
208 patients (Figure 1F). The highly developed vascular systems observed in both  
209 IP and REP placental villi suggested greater transport and availability of  
210 oxygen and nutrients from the ectopic microenvironment to support fetal  
211 development.

212

## 213 **Transcriptomic differences in signal pathways and developmental** 214 **markers between IP and TEP placental villi**

215 To identify transcriptomic differences between IP and TEP placental villi  
216 that underlie ectopic, rather than eutopic, pregnancy, we conducted RNA-seq  
217 analysis for five placental villi each from IP and TEP patients, using the same  
218 inclusion criteria as above. Principal component analysis (PCA) and  
219 unsupervised clustering showed that samples clustered into distinct IP and  
220 TEP groups, which suggested substantial differences in gene expression  
221 between placental villi in intrauterine and tubal pregnancies (Figure 2A-B).

222 We then performed GO and GSEA analyses on the differentially  
 223 expressed genes ( $|\log_2 \text{FoldChange}| \geq 0.6$  and  $P \text{ value} \leq 0.05$ ) to determine  
 224 which signaling pathways and/or developmental programs were enriched in  
 225 TEP (Figure 2C and S3A). The analysis suggested that expression of  
 226 inflammation-related genes was elevated in TEP samples, consistent with a  
 227 proposed link between inflammation and tubal implantation (Figure 2D and  
 228 S3B) (Dekel et al., 2014; Granot et al., 2012). We also found that  
 229 hypoxia-inducible genes in the oxidative stress-related gene set were  
 230 up-regulated in the TEP villi samples (Figure 2E and S3C), possibly due to the  
 231 elevated inflammatory response or compromised angiogenesis related to low  
 232 hCG (Lam et al., 2004; Roth et al., 2010). In addition, extracellular matrix  
 233 (ECM) organization- and cell adhesion-related genes were enriched in TEP  
 234 placental villi (Figure 2F and S3D) which, together with upregulation of  
 235 metalloendopeptidases (Figure 2G and S3E), suggested dysregulation of the  
 236 interactions between trophoblasts and the microenvironment (tubal walls).  
 237 Moreover, the expression of markers for large vessels and capillaries was  
 238 decreased in TEP villi (Figure 2H), which was in agreement with the inhibited  
 239 vascularization phenotype of TEP placental villi (Figure 1C-F and S2). Besides  
 240 of blood vessel markers, angiogenesis-associated genes (AAGs) (Qing et al.,  
 241 2022) were also down-regulated in TEP samples which, again, suggesting the  
 242 compromised angiogenesis process (Figure 2I). These results showed  
 243 substantial differences in gene expression patterns between placental villi that  
 244 developed in uteri versus fallopian tubes, despite their similar morphologies  
 245 and trophoblast organizations (see later).

246

## 247 **Secretory factors from placental villi promote angiogenesis**

248 To next investigate whether and which angiogenic factors may contribute  
 249 to aberrant vascularization in TEP villi, we performed 2D tube formation and

250 3D sprouting assays to visualize luminal, capillary-like development using  
 251 human umbilical vein endothelium cells (HUVECs) (Ko and Lung, 2012; Zahra  
 252 et al., 2019). Briefly, we conducted 2D and 3D angiogenesis assays by  
 253 culturing HUVECs as monolayers (tube formation assay) or spheroids  
 254 (sprouting assay) in media conditioned with either fetal or maternal explants  
 255 from each of the three pregnancy types (Figure 3A). Treatment with VEGF  
 256 strongly induced the formation of tube networks or vascular sprouts in both 2D  
 257 and 3D assays, respectively (Figure 3B and 3C), which indicated that these  
 258 platforms are robust for examining angiogenesis.

259 To determine whether angiogenic factor(s) are secreted from the  
 260 maternal-fetal interface, as well as to determine their origin, we surgically  
 261 isolated the maternal-fetal interfaces and separated their fetal (placental villi)  
 262 and maternal (uterine endometria or fallopian tubal walls) components,  
 263 cultured the explants, and harvested their respective conditioned media  
 264 (Figure 3A). In all three types of pregnancies, conditioned media obtained from  
 265 both fetal and maternal parts could promote angiogenesis in HUVEC-based  
 266 tube formation and sprouting assays (Figure 3B and 3C). However, we only  
 267 observed differences in pro-angiogenic potential between conditioned media  
 268 of IP, AEP, and REP from fetal placental villi explants (Figure 3C), not from  
 269 maternal tissues (Figure 3D). More specifically, compared to unconditioned  
 270 medium, the conditioned medium from IP villi led to the strongest induction of  
 271 tube network or sprout formation, followed by REP medium, then AEP medium,  
 272 which was highly correlated with differences in placental villi vascularization  
 273 observed by immunostaining (Figure 1C-E). These results led us to conclude  
 274 that the factor(s) responsible for differences in vascular development within  
 275 placental villi was secreted from the fetal compartment.

276

## 277 **IP and REP placental villi promote angiogenesis in a WNT-dependent** 278 **manner**

279 To identify which signaling pathway promotes angiogenesis in these  
280 placental villi, we re-examined the RNA-seq results and found multiple WNT  
281 pathway components that were downregulated in TEP placental villi (Figure  
282 4A). Since some WNT ligands also exhibit pro-angiogenic activity in cancers,  
283 atherosclerosis, and eye diseases (Foulquier et al., 2018; Taciak et al., 2018;  
284 Wang et al., 2019), we hypothesized that WNT ligands secreted from placental  
285 villi could promote angiogenesis. To test this possibility, we used the  
286  $\beta$ -catenin/CBP inhibitor ICG-001 (Akcora et al., 2018), as well as the tankyrase  
287 inhibitor XAV-939 (Jang et al., 2019), in combination with the conditioned  
288 media from IP, AEP, and REP, to interrogate the role of WNT signaling in  
289 angiogenesis using sprouting assay. Treatment with ICG-001 or XAV-939  
290 significantly abolished the pro-angiogenic effects of conditioned media from IP  
291 or REP, suggesting that the angiogenic effects on HUVECs were canonical  
292 WNT signaling-dependent (Figure 4B and S4A). Consistent with this finding,  
293 treatment with other WNT antagonists, including secreted frizzled-related  
294 protein 1 (sFRP-1) and WNT inhibitory factor 1 (WIF-1) (Kawano and Kypta,  
295 2003), also abolished the pro-angiogenic effects of IP- or TEP-conditioned  
296 media (Figure 4C and S4B). Notably, VEGF was almost undetectable in  
297 conditioned media from either IP or TEP placental villi, even at pg/ml ELISA  
298 sensitivity (Figure 4D). Since sFRP-1 and WIF-1 only inhibited pro-angiogenic  
299 effects of conditioned media (Figure 4C and S4B), not VEGF (Figure S5A), it's  
300 less likely that VEGF-induced expression of WNT ligands in placental villus  
301 promoted angiogenesis. Taken together, these results suggested that the  
302 WNT signaling pathway directly promoted angiogenesis during pregnancy and  
303 could lead to vascular growth in REP condition.

304



## 305 **WNT2B promotes angiogenesis partly through activating VEGF**

306 To identify the WNT ligand responsible for the observed pro-angiogenic  
 307 effects, we performed qPCR assays to quantify expression of all 19 human  
 308 WNT ligands in placental villi tissue of each of the three pregnancy types  
 309 (Figure 4E). Some WNT ligands that have been proposed to activate canonical  
 310 WNT signaling, such as *WNT2*, *WNT2B* (*WNT13*), *WNT7A*, and *WNT7B*, were  
 311 significantly up-regulated in IP and REP samples compared with their  
 312 expression in AEP villi (Figure 4E). Based on the highly significant  
 313 transcriptional induction in qPCR assays, we selected WNT2 and WNT2B for  
 314 subsequent analyses of their protein levels in conditioned media, ( $P =$   
 315 0.0049/0.0030, ANOVA, Tukey's method). We found that WNT2B was present  
 316 in high concentrations in IP-conditioned medium compared to WNT2 (100-200  
 317 ng/ml vs <10 ng/ml) (Figure 4F). Furthermore, ELISA assays showed that  
 318 WNT2B was secreted by IP and REP placental villi, but not by AEP villi (Figure  
 319 4G), which aligned with the respective differences in the pro-angiogenic  
 320 potential of their corresponding conditioned media (Figure 3C). These results  
 321 suggested that WNT2B was likely the ligand responsible for the  
 322 pro-angiogenic effects of IP-conditioned medium and its upregulation in REP  
 323 villi tissues implied that this factor could potentially drive vascular development  
 324 of ectopic placentae associated with prolonged fetal growth in fallopian tubes.

325 Since WNT2B has not yet been reported as an angiogenic factor in human,  
 326 we sought to determine whether WNT2B could indeed promote angiogenesis  
 327 in human cells. To this end, we transfected HEK293FT cells with a plasmid  
 328 transiently expressing a modified, active human WNT2B (MacDonald et al.,  
 329 2014) and harvested the conditioned medium for stimulating HUVECs in a  
 330 sprouting assay. The results indicated that WNT2B-conditioned medium  
 331 significantly promoted sprout formation, which could be abolished by WIF-1 or  
 332 sFRP-1 (Figure 4G). To further investigate the mechanism of

333 WNT2B-mediated angiogenesis, we analyzed targets of canonical WNT  
334 signaling in HUVECs after treatment with WNT2B-conditioned medium and  
335 found that both WNT2B and WNT agonist CHIR99021 significantly induced  
336 VEGF expression (Figure 4H). These findings thus established WNT2B as an  
337 pro-angiogenic factor for HUVECs and could be responsible for the angiogenic  
338 effects of villous conditioned media.

339

### 340 **WNT signaling is required for blood vessel development**

341 The sprouting assay starting from HUVEC cells only measures the  
342 angiogenesis effect. To examine whether WNT pathway is also involved in  
343 vasculogenesis, we first test whether inhibition of WNT signaling could also  
344 influence EC differentiation from human embryonic stem cells that  
345 conditionally expressed *ETV2*, which gradually induces EC differentiation  
346 (Cakir et al., 2019). To our surprise, only ICG-001 (PRI-724) exhibited strong  
347 inhibitory effect on EC differentiation and survival within a 2-day window  
348 (Figure 5A). ICG-001 also inhibited sprouting induced by VEGF as  
349 demonstrated by HUVEC sprouting (Figure 5B). In contrast, other WNT  
350 inhibitors, including XAV-939, and two PORCN inhibitors LGK974 and  
351 ETC-159 (Liu et al., 2013; Madan et al., 2016), exhibited strong inhibitory  
352 effects on sprouting formation rather than EC differentiation (Figure 5A-B and  
353 S5B). Those results, together, suggest that WNT signaling is more likely to be  
354 required for angiogenesis rather than vasculogenesis.

355 Recently developed blood vessel organoids derived from human  
356 pluripotent stem cells recapitulate the continuous process of mesoderm  
357 development, vascular specification and network expansion (Wimmer et al.,  
358 2019). We therefore tested whether WNT signaling is also required for the  
359 development of blood vessel organoids. Treatment of ICG-001 greatly shrank  
360 the size of blood vessel organoids (Figure 5C). We further validated the role of

WNT2B in vascular network formation and expansion in an *in vitro* microfluidic chip assay which provides unprecedented advantage for evaluating complex vascular network than other *in vitro* assays (Kim et al., 2013). The results showed that inhibition of WNT signaling by ICG-001 dramatically disrupted the vascular network formation in the microfluidic chips (Figure 5D). These results suggested that inhibition of  $\beta$ -catenin/CBP compromises the vasculogenesis, angiogenesis and vascular network formation.

### **WNT2B promotes blood vessel formation at vasculogenesis, angiogenesis, and network expansion levels**

Since WNT2B promotes sprouting of HUVEC (Figure 4F), we next examined whether WNT2B also promotes EC differentiation. Adding WNT2B<sup>+</sup> conditioned medium to the differentiation medium significantly increased CD31<sup>+</sup> cell numbers in this transdifferentiation system as compared with WNT2B<sup>-</sup> conditioned medium (Figure 5E). To further study at which stages WNT2B influences human blood vessel development, we dissected the formation of blood vessel organoids into vascular specification (cultured in 3D hydrogel) and vascular network formation (cultured in suspension) stages (Wimmer et al., 2019). Treatment of WNT2B<sup>+</sup> conditioned medium greatly increased the number and length of CD31<sup>+</sup> sprouts of blood vessel organoids at the vascular specification stage (Figure 5F). Importantly, we found WNT2B-conditioned medium not only significantly increased the size of blood vessel organoids, but also largely promoted the formation of vascular network in blood vessel organoids (Figure 5G-H). Based on these results, we conclude that WNT2B likely promotes vascularization at vasculogenesis, angiogenesis, and vascular network expansion levels.

# 388 **WNT2B secreted by syncytiotrophoblasts is greatly decreased in AEP** 389 **condition**

390 We next try to find the source of WNT2B in placental villi. Within the range  
391 of gestational ages analyzed here (40-64 days), the placental villi developed  
392 into the tertiary stage, forming dendritic chorionic villi in which each branch  
393 consisted of blood vessels, central stromal cells, the outer-most  
394 syncytiotrophoblast (STB) layer, a lower villous cytotrophoblast (vCTB) layer,  
395 and extravillous trophoblasts (EVTs) located at tips of anchoring villi (Figure  
396 1B) (Baergen, 2005). Since the placentae develop to different extents at  
397 similar gestational ages in REP and AEP, we further examined whether there  
398 were morphological or cellular differences among the chorionic villi of IP, AEP,  
399 and REP patients. Surprisingly, in all three types of placental villi,  
400 morphologically and structurally similar trophoblast shells (the STB and vCTB  
401 layers) surrounded the trophoblastic columns, as shown by histological and  
402 CK7 staining (Figure 6A-B). Furthermore, we observed similar extracellular  
403 and intracellular patterns of syndecan 1 (SDC-1), an extracellular marker of  
404 STBs, across all three types of placental villi, suggesting comparable STB  
405 maturation (Figure 6B). Immunostaining of TEA Domain Transcription Factor 4  
406 (TEAD4), a vCTB marker, also revealed that the number and arrangement of  
407 vCTBs was similar for all three types of placental villi (Figure 6B). Notably, we  
408 found that AEP and REP villi had larger diameter of trophoblastic columns  
409 compared with those of IP patients (Figure 6C). However, similar relative ratios  
410 of proliferative (KI67<sup>+</sup>TEAD4<sup>+</sup>) to quiescent (KI67<sup>-</sup>TEAD4<sup>+</sup>) vCTBs implied that  
411 proliferation of stem cell populations was also similar in the three types of  
412 placental villi (Figure 6C) (Liu et al., 2018). Excluding differences in  
413 trophoblastic column diameter, histological and immunological analyses  
414 showed only minor, if any, differences in morphology, arrangement,

415 trophoblast differentiation, and stem cell activity in the trophoblasts of placental  
416 villi from the three types of pregnancies.

417 We next compared the expression of trophoblast markers between IP and  
418 TEP villi and found only minor differences in some markers of vCTB and STB  
419 (Figure 6D). These findings indicated that implantation in the fallopian tubes  
420 did not substantially compromise the self-renewal of vCTBs and their  
421 differentiation potential toward STBs. In contrast, we did observe significant  
422 upregulation of EVT markers (e.g., *MMP2*, *ITGA1*, *ITGA5* and *HLA-G*) in  
423 placental villi of TEP (Figure 6D), which could be due to the relatively hypoxic  
424 condition in the fallopian tube (Chakraborty et al., 2011). The skewed  
425 differentiation of vCTB towards invasive trophoblasts (ETVs) was also  
426 consistent with dysregulation of the ECM, cell adhesion molecules, and  
427 secretory metallopeptidases (Figure 2G and S3E).

428 We next performed immunohistochemical staining of IP, REP, and AEP  
429 placental villi with anti-WNT2B antibody to identify the cell population  
430 responsible for WNT2B production. The results indicated that WNT2B was  
431 strongly expressed by trophoblasts (primarily STBs, with slightly lower  
432 expression in vCTBs and mild expression in ECs) in the trophoblastic columns  
433 of IP and REP villi (Figure 6E). Consistently, the expression level of WNT2B  
434 was largely decreased in AEP (Figure 6E). Those results suggested that the  
435 aberrant elevation of WNT2B level in the trophoblasts embedded in fallopian  
436 tubes could lead to excessive vascularization and eventually the rupture of  
437 fallopian tubes.

438

# 439 **Organoid cocultures reveal the essential role of trophoblast-secreted** 440 **WNT2B in promoting vascularization**

441 Since WNT2B is secreted from trophoblasts, we aim to develop a  
442 composite cell culture model to study how trophoblasts interact with

endothelial cells/ endothelial progenitor cells to influence vascular specification (Figure 7A). We first derived two trophoblast stem cell (TSC) lines from human blastocysts (Figure 7B) (Okoe et al., 2018). After establishing control and WNT2B-silenced TSC lines (Figure 7C-D), digested TSCs and blood vessel organoids at the stage of vascular lineage induction were simultaneously embedded in corresponding hydrogels within the Boyden and the bottom chamber, respectively, and cultured with TOM (trophoblast organoids) and blood vessel organoid medium (Turco et al., 2018; Wimmer et al., 2019). After six days, the matured trophoblast organoids were transferred and cultured with new blood vessel organoids (also at the vascular lineage induction stage) to investigate the interaction between these two organoids (Figure 7A). Interestingly, coculturing with trophoblast organoids did promote the sprouting of blood vessel organoids as compared with the control (hydrogel alone) (Figure 7E), consistent with the pro-angiogenic effect of conditioned media from placental villi (Figure 3C). Importantly, we were able to demonstrate that the pro-angiogenic effect of trophoblast organoids are dependent on WNT2B in this organoid coculture model, since knockdown of WNT2B significantly compromised the sprouting of blood vessel organoids (Figure 7E). Together with results from other assays, this composite culturing of trophoblast organoids and blood vessel organoids recapitulates the interaction between trophoblasts and blood vessel lineages and confirms the causal relationship between WNT2B and trophoblast-promoted vascularization.

465

#### 466 **The microenvironment of fallopian tubes modulates WNT2B expression**

In light of these results, we proposed intrinsic and extrinsic hypotheses to explain why WNT2B is differentially produced in REP but not AEP placental villi. In the intrinsic hypothesis, AEP and REP trophoblasts harbor distinct genetic or epigenetic mutations that result in aberrant WNT2B expression.

471 Alternatively, in the extrinsic hypothesis, the AEP and REP tubal  
472 microenvironments exhibit different crosstalk signals with trophoblasts,  
473 resulting in an indirect influence on WNT2B secretion. To test these two  
474 possibilities, we derived trophoblast organoids (TOs) from IP and TEP  
475 trophoblasts using previously published methods (Figure S6A) (Turco et al.,  
476 2018). To our surprise, IP- and TEP-derived TOs, generated from isolated  
477 villous stem cells (vCTB), and cultured under the same *in vitro* conditions,  
478 exhibited similar morphologies, transcriptome patterns, as well as WNT2B and  
479 other trophoblast marker expression levels (Figure S6B-D). Interestingly, hCG  
480 expression levels, the diagnostic marker which distinguishes AEP and REP,  
481 were indistinguishable between IP and TEP TOs (Figure S6E). Based on  
482 these results, it appears likely that extrinsic factors in the microenvironment  
483 affect WNT2B expression via communication with trophoblasts.

484 In summary, by employing multiple assays, we identified a novel  
485 WNT-dependent mechanism for intravillous angiogenesis during pregnancy  
486 (Figure 7F). This WNT-promoted angiogenesis is attributable to WNT2B  
487 secreted by the trophoblast shells of placental villi. WNT2B-regulated  
488 development of the villous vasculature is crucial for establishing fetal  
489 circulation. In TEP, ectopic implantation in fallopian tubes frequently leads to  
490 AEP, in which low WNT2B expression restricts angiogenesis and therefore  
491 further fetal growth. Alternatively, aberrant expression of WNT2B in certain  
492 conditions of TEP could result in extensive vascular formation in placental villi,  
493 leading to excessive fetal growth and tubal rupture.

494

## 495 Discussion

496 Ectopic pregnancy (EP) is a critical pregnancy complication and a major cause  
497 of pregnancy-related death. However, the pathological factors that lead to the  
498 rupture phenotype remain unknown and controversial. With particular care to

499 exclude confounding factors, in this study we interrogated clinical villi samples  
 500 from intrauterine as well as ruptured and abortive tubal ectopic pregnancies,  
 501 which revealed the development of excessive intravillous vascularization in  
 502 ruptured EP. A recent, large-scale knockout study in mice revealed the strong  
 503 correlation between placental defects and embryonic developmental  
 504 abnormalities (Perez-Garcia et al., 2018). Notably, a number of knockouts  
 505 showed detrimental impacts on the growth and organization of fetal and  
 506 maternal blood conduits within the mouse labyrinth layer, the functional analog  
 507 of human placental villi (Perez-Garcia et al., 2018). These findings, together  
 508 with ours, suggest a central role for intravillous angiogenesis in both normal  
 509 embryonic development as well as in pregnancy complications in humans.

510 Vascular remodeling during pregnancy can be viewed from either a  
 511 maternal or fetal perspective. From the maternal perspective, the  
 512 angiogenesis that occurs during decidualization and the remodeling of spiral  
 513 arteries together ensure a sufficient maternal blood supply. In contrast to  
 514 maternal angiogenesis, less is known about fetal intravillous angiogenesis,  
 515 which in fact represents an essential factor in the development of adequate  
 516 fetal circulation. Previous studies have identified PROK1 as a factor that  
 517 promotes intravillous angiogenesis potentially associated with pregnancy  
 518 complications (Alfaidy et al., 2014). Interestingly, we identified  
 519 trophoblast-secreted WNT2B as both a vasculogenic and an angiogenic factor  
 520 required for initiating fetal intravillous vascularization in both IP and REP.  
 521 WNT2 and WNT2B, which share 67% amino acid homology, are both  
 522 described as canonical WNT ligands. However, in mice, the *wnt2b* knockout  
 523 phenotype is largely indiscernible from that of wild type, except for distinct  
 524 olfactory bulb traits (Goss et al., 2009; Tsukiyama and Yamaguchi, 2012). In  
 525 contrast, *wnt2* knockout resulted in strong vasculature defects in placentae  
 526 and multiple organs, suggesting a major contribution to placental development



527 that more closely resembles our findings of WNT2B function in humans (Goss  
528 et al., 2009; Monkley et al., 1996). The fact that WNT2 levels did not  
529 significantly differ between IP- and EP-conditioned media suggests that  
530 WNT2B rather than WNT2 plays the major role in promoting intravillous  
531 angiogenesis in humans (Schmidt et al., 2015). Interestingly, both WNT2 and  
532 WNT2B have been reported in other human pregnancy complications (Li et al.,  
533 2017; Zhang et al., 2018). It's worthy to investigate the role of WNT-dependent  
534 angiogenesis in other pathological contexts.

535 The WNT signaling pathway has been shown in humans/rodents to  
536 promote or maintain angiogenesis in multiple organs as well as in tumors  
537 (Wang et al., 2019). Our data showed that Wnt stimulate VEGF expression in  
538 EC, which is consistent with previous results that VEGF as a downstream  
539 target of the WNT signal cascade (Zhang et al., 2001; Zhang et al., 2016).  
540 Previous results showed that WNT signaling is required for VEGF-induced  
541 endothelial differentiation from mesenchymal stem cells (Zhang et al., 2016).  
542 Our study further demonstrates that WNT2B can stimulate EC differentiation  
543 from pluripotent stem cells in the absence of VEGF. In addition, by employing  
544 the blood vessel organoid model, we showed the WNT2B could also enhances  
545 vascular network formation. Future investigations will help determining  
546 whether those three vascular formation processes promoted by WNT2B share  
547 the same molecular mechanism.

548 In summary, our findings employed organoid-based models to reveal the  
549 molecular basis underlying the etiology of REP and shed important insight on  
550 the potential of developing a novel therapeutic strategies. First, WNT2B, the  
551 WNT signal pathway, or vasculogenic structures in placental villi could be  
552 adopted as diagnostic markers in monitoring for REP or in the selection of  
553 appropriate therapeutic strategies, to exclude AEP for expectant or medical  
554 therapy. Second, antagonizing WNT2B, WNT signal pathway, or angiogenic

555 factors with neutralizing antibodies or inhibitors could be a viable approach to  
 556 inhibit or diminish ectopic fetal growth in fallopian tubes, thereby alleviating  
 557 symptoms. Third, since WNT2B overproduction likely results from cues in the  
 558 tubal wall microenvironment, antagonizing the factors or cell-cell interactions  
 559 that induce WNT2B expression could also represent a promising avenue for  
 560 therapeutic development. Clinical explants and organoid-based models  
 561 employed in this study will thus facilitate exploring the mechanisms of WNT2B  
 562 production and WNT-dependent vascular development to improve our  
 563 understanding of the intricate crosstalk at the maternal-fetal interface in  
 564 eutopic and ectopic pregnancies.

565

566

## 567 **Acknowledgments**

568 This research was supported by National Key R&D Program of China  
 569 (2020YFA0710800, 2021YFC2700100, and 2018YFC1004900), Key R&D  
 570 Program of Zhejiang (2021C03G2013079), Shanghai Science and Technology  
 571 Commission (19JC1414200), National Natural Science Foundation of China  
 572 (J.Z., 82171667; C.L., 31871487; D.Z., 81801400 and W.X., 81901503),  
 573 Strategic Collaborative Research Program of the Ferring Institute of  
 574 Reproductive Medicine (FIRMA200506), and the ShanghaiTech University  
 575 start-up fund. We thank the Multi-Omics Core Facility (MOCF), Molecular  
 576 Imaging Core Facility (MICF), and Molecular and Cell Biology Core Facility  
 577 (MCBCF) at the School of Life Science and Technology, ShanghaiTech  
 578 University for providing technical support. We would like to thank statistician of  
 579 Li Xie for expert advice on statistical analyses. We apologize for critical works  
 580 that are not cited due to space constraints.

581

## 582 **Author Contributions**

583 Contribution: X.Z., Z.Z. designed and performed research and analyzed data;  
584 S.S. and Y.L. performed research; Q.Z., D.Z. and W.X. collected clinical  
585 samples; Q.Y. analyzed the sequencing data; L.J and Y.X generated the  
586 ETV2-knockin human embryonic stem cells; C.L and J.Z. designed and  
587 performed research, analyzed data, and wrote the manuscript.  
588  
589

590     **Declaration of Interests**

591     The authors have declared that no conflict of interest exists.

592

## 593 **Methods**

### 594 **3D reconstruction of placental villous vascular networks**

595 The protocol of clarification and 3D reconstruction of immunolabeled placental  
596 villous vascular network was from the Merz G et al (Merz et al., 2018). Villous  
597 trees were incubated with anti-CK7 and anti-CD31 antibodies. Samples were  
598 treated with HISTO-1 (Visikol) and HISTO-2 (Visikol) for 4h at RT for  
599 clarification. The clarified tissues were placed in HISTO-2, put in the  
600 Sykes-Moore chamber (BellCo Glass) and scanned using Leica SP8 confocal  
601 microscope.

602

### 603 **Explant of tissues from maternal-fetal interfaces and ELISA**

604 Explants were cultured according to a previously published protocol with minor  
605 modifications (James et al., 2006). Briefly, maternal-fetal interfaces were  
606 surgically dissected. Villous tips or maternal tissues (uterine endometria or  
607 fallopian tube walls) were separated, weighted, and placed in the center of  
608 wells of 48-well plates. The villous explants were incubated in basal media  
609 consisting of advanced DMEM/F12 (Life Technologies, #12634-010)  
610 containing 1% Glutamax (Life Technologies, #35050-061), 100 µg/ml  
611 streptomycin and 100 U/ml penicillin (Life Technologies, #15140-122). Human  
612 endometrial and fallopian tube explants were also cultured in basal media. The  
613 explants were strictly cultured in 5 µl medium volume per mg wet weight. The  
614 conditional medium was collected every 24 hours for 2 days.

615

616 Conditioned media were collected from explant cultures, centrifuged at 3000  
617 rpm to remove debris and stored at -80°C until use. The target protein levels  
618 in conditional media were quantified using ELISA following manufacturer's  
619 instructions. Vascular endothelial growth factor (VEGF) ELISA kits were  
620 purchased from Absin, Shanghai (#abs510008-96T); WNT2 and WNT2B were

621 measured using ELISA kit from FineTest, Wuhai (#EH2251 and #EH2250).  
622 Each sample with three replications.

623

# **624 RNA-seq analyses**

625 Total RNA was extracted from the chorionic villi samples or placental villus  
626 organoids using Trizol (Invitrogen, #15596026) according to manufacturer's  
627 instruction. The RNA purity was checked using the kaiaoK5500  
628 spectrophotometer (Kaiao, Beijing, China). The RNA integrity and  
629 concentration were assessed on Bioanalyzer 2100 system (Agilent  
630 Technologies, CA, USA) using RNA Nano 6000 Assay Kit. All primary samples  
631 have RNA integrity number equivalent (RINe) values > 8.5. Sequencing  
632 libraries were generated using NEBNext Ultra RNA Library Prep Kit for  
633 Illumina (#E7530L, NEB, USA) following the manufacturer's recommendations  
634 and index codes were added to attribute sequences to each sample. Briefly,  
635 mRNA was purified using poly-T oligo-attached magnetic beads, and then  
636 fragmented and reverse transcribed into double-stranded complementary DNA.  
637 The library fragments were purified with QiaQuick PCR kits and elution with EB  
638 buffer, then terminal repair, A-tailing and adapter added were implemented.  
639 The aimed products were retrieved and PCR was performed, then the library  
640 was completed. RNA concentration of library was measured using Qubit RNA  
641 Assay Kit in Qubit 3.0 to preliminary quantify and then dilute to 1ng/μl. Insert  
642 size was assessed using the Agilent Bioanalyzer 2100 system (Agilent  
643 Technologies, CA, USA), and accurated quantification using StepOnePlus  
644 Real-Time PCR System (Library valid concentration > 10 nM). The libraries  
645 were then sequenced on the Illumina HiSeq PE Cluster Kit v4-cBot-HS  
646 (Illumina) with 150-bp paired-end reads (GSE183319 and GSE185119). The  
647 reference genomes (Homo sapiens GRCh38) and the annotation file were  
648 downloaded from ENSEMBL database (<http://www.ensembl.org/index.html>).

649 Bowtie2 v2.2.3 was used for building the genome index, and Clean Data was  
650 then aligned to the reference genome using HISAT2 v2.1.0 (Kim et al., 2015).  
651 For female samples, the Y chromosome was excluded from the reference  
652 genome. The read count for each gene in each sample was counted by HTSeq  
653 v0.6.0, and then calculated to estimate the expression level of genes by  
654 DESeq2 (Anders and Huber, 2010; Love et al., 2014). Differentially expressed  
655 genes were identified using DESeq2 (Anders and Huber, 2010; Love et al.,  
656 2014).

657

658 A fold change  $\geq 1.5$  and a P value  $< 0.05$  were considered to indicate the  
659 differentially expressed genes (DEGs) (Table S4). The obtained DEGs were  
660 visualized in a volcano and heatmap plots with gplots (Warnes et al., 2005)  
661 and ggplot2 (Wickham, 2016) R Bioconductor packages  
662 [<http://www.r-project.org/>]. Furthermore, more in-depth analyses based on the  
663 DEGs, including GO enrichment analysis, KEGG pathway enrichment analysis,  
664 and Gene Set Enrichment Analysis (GSEA).

665

#### 666 **Tubal network formation angiogenesis assay**

667 Examining the formation of tube-like structures. Once HUVECs reaches 70-80%  
668 confluence, the cells were serum starved for 4 hours so that it performs the  
669 tube formation assay better (Ko and Lung, 2012). Briefly, distributing 50  $\mu$ l  
670 growth factor-reduced Matrigel (Corning, #354230) per well of the pre-chilled  
671 96-well plate on ice and incubating at 37 °C for 30 min to polymerization.  
672  $1 \times 10^5$  HUVECs were resuspended in the conditional medium (100  $\mu$ l) and  
673 seeded onto the 96-well plates precoated with Matrigel (Corning, #354230).  
674 After 24 hours, tube formation was quantified by measuring the cumulative  
675 tube length, loop count, loop area, and branch count with FIJI (Tetzlaff and  
676 Fischer, 2018).

677

## 678 **Sprouting angiogenesis assay**

679 To examine capillary sprouting, HUVECs were used to generate spheroids at  
 680 the density of 800 cells/spheroid in-gel as previously described (Zahra et al.,  
 681 2019). The spheroids were cultured in basal media or conditioned media from  
 682 explants or WNT2B-overexpressing HEK293T cells containing one or multiple  
 683 following factors. At the first day for spheroids formation, HUVECs were  
 684 suspended in the EGM2/methylcellulose medium (40 cells/ $\mu$ l) and distributed  
 685 in 20  $\mu$ l hanging drops on the lid of 10 cm dishes and incubated at 37°C for 24  
 686 h. At the second day, spheroids were harvested and embedded in the  
 687 methylcellulose/collagen type I gel mix, followed by incubation for 30 min at  
 688 37°C for polymerization. Subsequently, spheroids were cultured in basal  
 689 medium only or with factors at 37°C for 24 h. Statistical analyses of HUVEC  
 690 sprouts were performed by randomly selecting 15 spheroids, measuring the  
 691 number of sprouts per spheroid (Tetzlaff and Fischer, 2018). Each experiment  
 692 was repeated at least two times.

693

## 694 **WNT2B conditioned medium**

695 The WNT2B conditioned medium was generated via transfecting HEK293FT  
 696 cells with the pcDNA3.1-WNT2B plasmid (synthesized by Tsingke Biological  
 697 Technology, China) (MacDonald et al., 2014). Control HEK293FT cells were  
 698 transfected with the empty pcDNA3.1 vector. After cells grew to confluence in  
 699 DMEM/F12 (10% FBS), media was replaced with basal medium for 24 hours  
 700 before collection.

701

## 702 **Endothelial cell differentiation**

703 Human H9 embryonic stem cells with *tetO-ETV2* and *rtTA* knock-in (the  
 704 detailed editing strategy will be described in other studies) were used to



705 generate endothelial cells. Briefly, cultured stem cell colonies were directly  
706 treated with 2 µg/ml doxycycline in mTeSR-1 medium for 48 hrs. The  
707 appearance of endothelial cells was then examined by CD31 immunostaining.

708

### 709 **Microfluidic chip assay**

710 Microfluidic chips were designed and fabricated according to the previous  
711 study (Kim et al., 2013). In brief, HUVEC and HPF were trypsinized and  
712 resuspended in 5 mg/mL fibrinogen (Sigma, F8630), supplemented with 0.30  
713 U/mL aprotinin (Sigma, #A1153) at a density of 12E6 cell/mL (HUVEC) and  
714 4E6 cell/mL (HPF). The 2X mixture was then mixed with 2 U/mL thrombin  
715 (Sigma, #T4648) at a 1:1 (v:v) ratio. The central channel and side channel  
716 were filled with HUVEC cell solutions and HPF cell solutions respectively and  
717 left to clot at room temperature for 5 minutes. Chips were then placed in a  
718 humid chamber and given basic endothelial growth medium 2 with and treated  
719 with 10 µM ICG-001 for five days and changed medium every two days during  
720 this time. At day 5, cells were fixed by introducing 4% PFA into the medium  
721 channel for 1 hour at room temperature and then staining with phalloidin.

722

### 723 **Blood vessel organoid formation assay**

724 Blood vessel organoids were generated from human H1 embryonic stem cell  
725 following Wimmer et al except EGM-2 was used instead of StemPro-34  
726 medium (Wimmer et al., 2019). For mifepristone treatment, the drug was  
727 added at the time inducing vascular lineage differentiation (day 3). For WNT2B  
728 treatment, WNT2B-conditioned EGM-2 medium was added at the time cell  
729 aggregates were embedded into 3D matrix (day 5). Organoids were fixed at  
730 day 8-9 and immunostained with CD31 antibodies.

731

### 732 **Trophoblast organoid culture**

Derivation of human trophoblast organoids (TOs) was based on the previously published method (Turco et al., 2018). TOs in matrigel drops were carefully overlaid with 250  $\mu$ l trophoblast organoid medium (TOM) consisting of Advanced DMEM/F12 (Life Technologies) supplemented with 1 $\times$ N2, 1 $\times$ B27, 2 mM Glutamax, 100  $\mu$ g/ml streptomycin and 100 U/ml penicillin, 1.25 mM N-Acetyl-L-cysteine, 500 nM A 83-01, 1.5  $\mu$ M CHIR99021, 50 ng/ml recombinant human EGF, 80 ng/ml recombinant human R-spondin 1, 100 ng/ml recombinant human FGF2, 50 ng/mL recombinant human HGF, 10 mM nicotinamide, 2  $\mu$ M Y-27632, and 2.5  $\mu$ M prostaglandin E2 (PGE2). The baseline characteristics are provided in the Supplemental Table 3.

743

#### 744 **RNA-seq analyses**

RNA-seq reads (GSE183319 and GSE185119) were aligned to the *Homo sapiens* GRCh38 reference genome. The read counts for each gene in each sample was counted by HTSeq v0.6.0, and then calculated to estimate the expression level of genes by DESeq2 (Anders and Huber, 2010; Love et al., 2014).

750

#### 751 **Statistics**

The student's *t*-test, Welch's *t* test and one-way ANOVA were used to determine the statistical significance. Tukey's method was used in one-way ANOVA to make multiple comparisons. Continuous variables are presented as mean  $\pm$  standard deviation (SD)/standard error of mean (SEM). The linear regressions of measured parameters were calculated with ages and gestational days as independent variables.

758

#### 759 **Study Approval**

760 All human tissues used in the study were obtained through the International  
761 Peace Maternity and Child Health Hospital (IPMCH) in Shanghai, China and  
762 taken with the written informed consent from Chinese pregnant women.  
763 Human blastocysts used for trophoblast stem cell derivation were obtained  
764 through the Women's Hospital, Zhejiang University School of Medicine. The  
765 study was approved by the institutional ethics committee of the IPMCH  
766 (GKLW201909) and Zhejiang Women's Hospital (SC-2019001). Details about  
767 distribution of samples according to baseline characteristics are provided in  
768 the Figure S1A and Table S1-3.

769

## 770 **References**

771 (2013). Medical treatment of ectopic pregnancy: a committee opinion. *Fertil*  
772 *Steril* 100, 638-644.

773 Akcora, B., Storm, G., and Bansal, R. (2018). Inhibition of canonical WNT  
774 signaling pathway by  $\beta$ -catenin/CBP inhibitor ICG-001 ameliorates liver  
775 fibrosis in vivo through suppression of stromal CXCL12. *Biochim Biophys Acta*  
776 *Mol Basis Dis* 1864, 804-818.

777 Alfaidy, N., Hoffmann, P., Boufettal, H., Samouh, N., Aboussaouira, T.,  
778 Benharouga, M., Feige, J.J., and Brouillet, S. (2014). The multiple roles of  
779 EG-VEGF/PROK1 in normal and pathological placental angiogenesis. *Biomed*  
780 *Res Int* 2014, 451906.

781 Alkatout, I., Honemeyer, U., Strauss, A., Tinelli, A., Malvasi, A., Jonat, W.,  
782 Mettler, L., and Schollmeyer, T. (2013). Clinical diagnosis and treatment of  
783 ectopic pregnancy. *Obstet Gynecol Surv* 68, 571-581.

784 Anders, S., and Huber, W. (2010). Differential expression analysis for  
785 sequence count data. *Genome Biol* 11, R106.

786 Baergen, R.N. (2005). Chapter 5 -Early Placental Development. In *Manual of*  
787 *Benirschke and Kaufmann's Pathology of the Human Placenta* (New York, Ny:

Springer), pp. 69-79.

Barut, A., Barut, F., Kandemir, N.O., Aktunc, E., Arikan, I., Harma, M., Harma, M.I., and Gun, B.D. (2012). Placental chorangiosis: the association with oxidative stress and angiogenesis. *Gynecol Obstet Invest* 73, 141-151.

Benirschke, K., Burton, G.J., and Baergen, R.N. (2012). Placental Types. In *Pathology of the Human Placenta*, K. Benirschke, G.J. Burton, and R.N. Baergen, eds. (Berlin, Heidelberg: Springer Berlin Heidelberg), pp. 27-39.

Blundell, C., Tess, E.R., Schanzer, A.S., Coutifaris, C., Su, E.J., Parry, S., and Huh, D. (2016). A microphysiological model of the human placental barrier. *Lab Chip* 16, 3065-3073.

Bronson, R. (2018). Ectopic pregnancy-still a challenge. *Fertil Steril* 110, 1265-1266.

Cakir, B., Xiang, Y., Tanaka, Y., Kural, M.H., Parent, M., Kang, Y.J., Chapeton, K., Patterson, B., Yuan, Y., He, C.S., *et al.* (2019). Engineering of human brain organoids with a functional vascular-like system. *Nat Methods* 16, 1169-1175.

Caspi, E., and Sherman, D. (1987). Tubal abortion and infundibular ectopic pregnancy. *Clin Obstet Gynecol* 30, 155-163.

Chakraborty, D., Rumi, M.A., Konno, T., and Soares, M.J. (2011). Natural killer cells direct hemochorial placentation by regulating hypoxia-inducible factor dependent trophoblast lineage decisions. *Proc Natl Acad Sci U S A* 108, 16295-16300.

Corpa, J.M. (2006). Ectopic pregnancy in animals and humans. *Reproduction* 131, 631-640.

Dekel, N., Gnainsky, Y., Granot, I., Racicot, K., and Mor, G. (2014). The role of inflammation for a successful implantation. *Am J Reprod Immunol* 72, 141-147.

Doubilet, P.M., Benson, C.B., Bourne, T., and Blaivas, M. (2014). Diagnostic criteria for nonviable pregnancy early in the first trimester. *Ultrasound Q* 30,

816 3-9.

817 Farquhar, C.M. (2005). Ectopic pregnancy. *Lancet* 366, 583-591.

818 Foulquier, S., Daskalopoulos, E.P., Lluri, G., Hermans, K.C.M., Deb, A., and

819 Blankesteyn, W.M. (2018). WNT Signaling in Cardiac and Vascular Disease.

820 *Pharmacol Rev* 70, 68-141.

821 Fukami, T., Tsujioka, H., Matsuoka, S., Sorano, S., Tohyama, A., Yamamoto,

822 H., Nakamura, S., Goto, M., Matsuoka, R., and Eguchi, F. (2016). Rupture risk

823 factors of fallopian tubal pregnancy. *Clin Exp Obstet Gynecol* 43, 800-802.

824 Furukawa, S., Kuroda, Y., and Sugiyama, A. (2014). A comparison of the

825 histological structure of the placenta in experimental animals. *J Toxicol Pathol*

826 27, 11-18.

827 Goksedef, B.P.C., Kef, S., Akca, A., Bayik, R.N.E., and Cetin, A. (2011). Risk

828 factors for rupture in tubal ectopic pregnancy: definition of the clinical findings.

829 *European Journal of Obstetrics & Gynecology and Reproductive Biology* 154,

830 96-99.

831 Goss, A.M., Tian, Y., Tsukiyama, T., Cohen, E.D., Zhou, D., Lu, M.M.,

832 Yamaguchi, T.P., and Morrissey, E.E. (2009). Wnt2/2b and beta-catenin

833 signaling are necessary and sufficient to specify lung progenitors in the foregut.

834 *Dev Cell* 17, 290-298.

835 Granot, I., Gnainsky, Y., and Dekel, N. (2012). Endometrial inflammation and

836 effect on implantation improvement and pregnancy outcome. *Reproduction*

837 144, 661-668.

838 Hemberger, M., Hanna, C.W., and Dean, W. (2020). Mechanisms of early

839 placental development in mouse and humans. *Nat Rev Genet* 21, 27-43.

840 Hendriks, E., Rosenberg, R., and Prine, L. (2020). Ectopic Pregnancy:

841 Diagnosis and Management. *Am Fam Physician* 101, 599-606.

842 James, J.L., Stone, P.R., and Chamley, L.W. (2006). The effects of oxygen

843 concentration and gestational age on extravillous trophoblast outgrowth in a

844 human first trimester villous explant model. *Human Reproduction* 21,  
845 2699-2705.

846 Jang, J., Jung, Y., Chae, S., Bae, T., Kim, S.M., Shim, Y.J., Chung, S.I., and  
847 Yoon, Y. (2019). XAV939, a Wnt/ $\beta$ -catenin pathway modulator, has inhibitory  
848 effects on LPS-induced inflammatory response. *Immunopharmacol*  
849 *Immunotoxicol* 41, 394-402.

850 Kaufmann, P., Mayhew, T.M., and Charnock-Jones, D.S. (2004). Aspects of  
851 human fetoplacental vasculogenesis and angiogenesis. II. Changes during  
852 normal pregnancy. *Placenta* 25, 114-126.

853 Kawano, Y., and Kypta, R. (2003). Secreted antagonists of the Wnt signalling  
854 pathway. *J Cell Sci* 116, 2627-2634.

855 Kim, D., Langmead, B., and Salzberg, S.L. (2015). HISAT: a fast spliced  
856 aligner with low memory requirements. *Nature Methods* 12, 357-360.

857 Kim, S., Lee, H., Chung, M., and Jeon, N.L. (2013). Engineering of functional,  
858 perfusable 3D microvascular networks on a chip. *Lab Chip* 13, 1489-1500.

859 Ko, J.M.Y., and Lung, M.L. (2012). In vitro Human Umbilical Vein Endothelial  
860 Cells (HUVEC) Tube-formation Assay. *Bio-protocol* 2, e260.

861 Lam, P.M., Briton-Jones, C., Cheung, C.K., Leung, S.W., Cheung, L.P., and  
862 Haines, C. (2004). Increased messenger RNA expression of vascular  
863 endothelial growth factor and its receptors in the implantation site of the human  
864 oviduct with ectopic gestation. *Fertil Steril* 82, 686-690.

865 Li, N., Li, S., Wang, Y., Wang, J., Wang, K., Liu, X., Li, Y., and Liu, J. (2017).  
866 Decreased expression of WNT2 in villi of unexplained recurrent spontaneous  
867 abortion patients may cause trophoblast cell dysfunction via downregulated  
868 Wnt/ $\beta$ -catenin signaling pathway. *Cell Biol Int* 41, 898-907.

869 Liu, H., Huang, X., Mor, G., and Liao, A. (2020). Epigenetic modifications  
870 working in the decidualization and endometrial receptivity. *Cell Mol Life Sci* 77,  
871 2091-2101.

872 Liu, J., Pan, S., Hsieh, M.H., Ng, N., Sun, F., Wang, T., Kasibhatla, S., Schuller,  
873 A.G., Li, A.G., Cheng, D., *et al.* (2013). Targeting Wnt-driven cancer through  
874 the inhibition of Porcupine by LGK974. *Proc Natl Acad Sci U S A* 110,  
875 20224-20229.

876 Liu, Y., Fan, X., Wang, R., Lu, X., Dang, Y.-L., Wang, H., Lin, H.-Y., Zhu, C., Ge,  
877 H., Cross, J.C., *et al.* (2018). Single-cell RNA-seq reveals the diversity of  
878 trophoblast subtypes and patterns of differentiation in the human placenta *Cell*  
879 *Research* 28, 819-832.

880 Love, M.I., Huber, W., and Anders, S. (2014). Moderated estimation of fold  
881 change and dispersion for RNA-seq data with DESeq2. *Genome Biol* 15, 550.

882 MacDonald, B.T., Hien, A., Zhang, X., Iranloye, O., Virshup, D.M., Waterman,  
883 M.L., and He, X. (2014). Disulfide bond requirements for active Wnt ligands. *J*  
884 *Biol Chem* 289, 18122-18136.

885 Madan, B., Ke, Z., Harmston, N., Ho, S.Y., Frois, A.O., Alam, J., Jeyaraj, D.A.,  
886 Pendharkar, V., Ghosh, K., Virshup, I.H., *et al.* (2016). Wnt addiction of  
887 genetically defined cancers reversed by PORCN inhibition. *Oncogene* 35,  
888 2197-2207.

889 Marion, L.L., and Meeks, G.R. (2012). Ectopic pregnancy: History, incidence,  
890 epidemiology, and risk factors. *Clin Obstet Gynecol* 55, 376-386.

891 Merz, G., Schwenk, V., Shah, R., Salafia, C., Necaie, P., Joyce, M., Villani, T.,  
892 Johnson, M., and Crider, N. (2018). Three-dimensional Rendering and  
893 Analysis of Immunolabeled, Clarified Human Placental Villous Vascular  
894 Networks. *J Vis Exp*.

895 Monkley, S.J., Delaney, S.J., Pennisi, D.J., Christiansen, J.H., and Wainwright,  
896 B.J. (1996). Targeted disruption of the Wnt2 gene results in placentation  
897 defects. *Development* 122, 3343-3353.

898 Ng, S.W., Norwitz, G.A., Pavlicev, M., Tilburgs, T., Simón, C., and Norwitz, E.R.  
899 (2020). Endometrial Decidualization: The Primary Driver of Pregnancy Health.

900 Int J Mol Sci 21.

901 Okae, H., Toh, H., Sato, T., Hiura, H., Takahashi, S., Shirane, K., Kabayama, Y.,

902 Suyama, M., Sasaki, H., and Arima, T. (2018). Derivation of Human

903 Trophoblast Stem Cells. *Cell Stem Cell* 22, 50-63.e56.

904 Perez-Garcia, V., Fineberg, E., Wilson, R., Murray, A., Mazzeo, C.I., Tudor, C.,

905 Sienerth, A., White, J.K., Tuck, E., Ryder, E.J., *et al.* (2018). Placentation

906 defects are highly prevalent in embryonic lethal mouse mutants. *Nature* 555,

907 463-468.

908 Plaisier, M., Rodrigues, S., Willems, F., Koolwijk, P., van Hinsbergh, V.W., and

909 Helmerhorst, F.M. (2007). Different degrees of vascularization and their

910 relationship to the expression of vascular endothelial growth factor, placental

911 growth factor, angiopoietins, and their receptors in first-trimester decidual

912 tissues. *Fertil Steril* 88, 176-187.

913 Qing, X., Xu, W., Liu, S., Chen, Z., Ye, C., and Zhang, Y. (2022). Molecular

914 Characteristics, Clinical Significance, and Cancer Immune Interactions of

915 Angiogenesis-Associated Genes in Gastric Cancer. *Front Immunol* 13,

916 843077.

917 Roth, A., König, P., van Zandbergen, G., Klinger, M., Hellwig-Bürgel, T.,

918 Däubener, W., Bohlmann, M.K., and Rupp, J. (2010). Hypoxia abrogates

919 antichlamydial properties of IFN- $\gamma$  in human fallopian tube cells in vitro and ex

920 vivo. *Proc Natl Acad Sci U S A* 107, 19502-19507.

921 Santa, L.M., Teshima, L.Y., Forero, J.V., and Giraldo, A.O. (2015). AngiomiRs:

922 Potential Biomarkers of Pregnancy's Vascular Pathologies. *J Pregnancy* 2015,

923 320386.

924 Sato, Y. (2020). Endovascular trophoblast and spiral artery remodeling. *Mol*

925 *Cell Endocrinol* 503, 110699.

926 Schmidt, A., Morales-Prieto, D.M., Pastuschek, J., Fröhlich, K., and Markert,

927 U.R. (2015). Only humans have human placentas: molecular differences



928 between mice and humans. *J Reprod Immunol* 108, 65-71.

929 Sherer, D.M., and Abulafia, O. (2001). Angiogenesis during implantation, and  
930 placental and early embryonic development. *Placenta* 22, 1-13.

931 Soma, H., Murai, N., Tanaka, K., Oguro, T., Kokuba, H., Fujita, K., and Mineo,  
932 S. (2013). Angiogenesis in villous chorangiosis observed by ultrastructural  
933 studies. *Med Mol Morphol* 46, 77-85.

934 Taciak, B., Pruszyńska, I., Kiraga, L., Bialasek, M., and Krol, M. (2018). Wnt  
935 signaling pathway in development and cancer. *J Physiol Pharmacol* 69.

936 Tetzlaff, F., and Fischer, A. (2018). Human Endothelial Cell Spheroid-based  
937 Sprouting Angiogenesis Assay in Collagen. *Bio-protocol* 8, e2995.

938 Tsukiyama, T., and Yamaguchi, T.P. (2012). Mice lacking Wnt2b are viable and  
939 display a postnatal olfactory bulb phenotype. *Neurosci Lett* 512, 48-52.

940 Turco, M.Y., Gardner, L., Kay, R.G., Hamilton, R.S., Prater, M., Hollinshead,  
941 M.S., McWhinnie, A., Esposito, L., Fernando, R., Skelton, H., *et al.* (2018).  
942 Trophoblast organoids as a model for maternal–fetal interactions during  
943 human placentation. *Nature* 564, 263-267.

944 Verlohren, S., and Dröge, L.-A. (2020). The diagnostic value of angiogenic and  
945 antiangiogenic factors in differential diagnosis of preeclampsia. *American*  
946 *Journal of Obstetrics and Gynecology*.

947 Wang, Y., and Zhao, S. (2010). Chapter6, Vasculogenesis and Angiogenesis  
948 of Human Placenta. In *Vascular Biology of the Placenta* (San Rafael (CA):  
949 Morgan & Claypool Life Sciences).

950 Wang, Z., Liu, C.H., Huang, S., and Chen, J. (2019). Wnt Signaling in vascular  
951 eye diseases. *Prog Retin Eye Res* 70, 110-133.

952 Warnes, G., Bolker, B., Bonebakker, L., Gentleman, R., Huber, W., Liaw, A.,  
953 Lumley, T., Mächler, M., Magnusson, A., and Möller, S. (2005). *gplots: Various*  
954 *R programming tools for plotting data*, Vol 2.

955 Wickham, H. (2016). *ggplot2: elegant graphics for data analysis* (Springer).

956 Wimmer, R.A., Leopoldi, A., Aichinger, M., Wick, N., Hantusch, B.,  
957 Novatchkova, M., Taubenschmid, J., Hämmerle, M., Esk, C., Bagley, J.A., *et al.*  
958 (2019). Human blood vessel organoids as a model of diabetic vasculopathy.  
959 Nature 565, 505-510.

960 Zahra, F.T., Choleva, E., Sajib, M.S., Papadimitriou, E., and Mikelis, C.M.  
961 (2019). In Vitro Spheroid Sprouting Assay of Angiogenesis. In The  
962 Extracellular Matrix: Methods and Protocols, D. Vigetti, and A.D. Theocharis,  
963 eds. (New York, NY: Springer New York), pp. 211-218.

964 Zhang, L., Li, W., Song, W., Ran, Y., Yuan, Y., Jia, L., Liu, L., Li, Y., Cui, S., and  
965 Zhang, Z. (2018). Detection of WNT2B, WIF1 and  $\beta$ -catenin expression in  
966 preeclampsia by placenta tissue microarray. Clin Chim Acta 487, 179-185.

967 Zhang, X., Gaspard, J.P., and Chung, D.C. (2001). Regulation of Vascular  
968 Endothelial Growth Factor by the Wnt and K-ras Pathways in Colonic  
969 Neoplasia. Cancer Research 61, 6050-6054.

970 Zhang, Z., Nör, F., Oh, M., Cucco, C., Shi, S., and Nör, J.E. (2016).  
971 Wnt/ $\beta$ -Catenin Signaling Determines the Vasculogenic Fate of Postnatal  
972 Mesenchymal Stem Cells. Stem Cells 34, 1576-1587.

973  
974

# Figure legends

976

## Figure 1. IP, AEP and REP placental villi exhibit major differences in

978 **intravillous vascularization.** (A) Schematic illustration (left) and

979 representative macroscopic images (right) of three types of pregnancies. Left,

980 in intrauterine pregnancy (IP), embryos are implanted on the endometrium of

981 the uterus. In both abortive pregnancy (AEP) and ruptured pregnancy (REP),

982 embryos are implanted on fallopian tubes, yet only REP exhibits excessive

983 trophoblast invasion and overgrowth of fetuses, leading to the rupture of tubal

984 walls. (B) Schematic illustration images of the placental villus. In the first

985 trimester of pregnancy, the trophoblastic column of placental villus is consisted

986 of intervillous capillaries and stromal cells, both of which are surrounded by

987 trophoblast shells made of syncytiotrophoblasts (STBs) and villus

988 cytotrophoblasts (vCTB). In anchoring villi, vCTBs protrude the STB layer and

989 differentiate into extravillous trophoblasts (EVTs). VE: vascular endothelium,

990 NRBC: nucleated red blood cell, BV: blood vessel. (C) Left, representative

991 images of immunohistochemical staining for CD31 to identify intravillous

992 capillaries (arrows) in cross sections of IP (n=8), AEP (n=5), and REP (n=6)

993 placental villi. Right, quantification of vascular numbers and the ratio of

994 vascular numbers to total cross area of villi in three types of pregnancies. Each

995 dot represents a clinical sample. AEP placental villi contain much less

996 capillaries and fewer branches per unit area than REP, which present no

997 significant difference in vascular numbers compared with IP. Scale bars, 100

998  $\mu\text{m}$ . Data represents mean  $\pm$  SEM. (D) Immunohistochemical staining of CD31

999 in longitudinal sections of IP, AEP, and REP placental villi. Scale bars, 100  $\mu\text{m}$ .

1000 (E-F) IP and REP placental villi exhibit higher vascularization level in cleared

1001 tissues. 16 samples of IP, 15 samples of AEP, and 8 samples of REP placental

1002 villi were cleared and immunostained for CK7 (green, trophoblasts) and CD31

1003 (red, endothelial cells). Stereoscopic views of one representative sample for

each type of pregnancy are shown (see Figure S2 for the additional representative sample). Lower, skeletonization of CD31 staining to visualize vascular systems of IP, AEP and REP placental villi with quantification of capillaries in cleared placental villi from three types of pregnancies (F). Each dot represents a clinical sample. AEP (n=15) placental villi contained compromised vascular systems compared with IP (n=16) in the first trimester of pregnancy in number of branches, diameters, and volumes, while REP (n=8) placental villi possessed vascular structures more resembling IP condition. Scale bars, 100  $\mu$ m. Quantification results are represented as mean  $\pm$  SEM. \* $P$  < .05, \*\* $P$  < .01, \*\*\* $P$  < .001, \*\*\*\* $P$  < .0001.  $P$  values were calculated by ANOVA, Tukey's test.

1015

**Figure 2. Transcriptome analyses of signaling pathways and developmental states in IP and TEP conditions.** (A, B) Transcriptomes of placental villi from intrauterine pregnancy (IP, n=5) and tubal ectopic pregnancy (TEP, n=5) are segregated into two groups, as demonstrated by principal component analysis (PCA) (A) and unsupervised hierarchical clustering based on top 1,123 differentially expressed genes (DEGs) (B). Oval represents confidence intervals for IP (triangle) and TEP (circle). (C) The volcano plot for comparison of IP (n=5) and TEP (n=5) transcriptomes. Red dots represent up-regulated genes, green dots represent down-regulated genes, and the grey dots represent genes with no significant differences in expression levels. Important DEGs revealed in pathway analyses are annotated. (D-G) Pathway-specific enrichment of genes up-regulated in TEP. (F-G) Expression of markers of large vessels and capillaries (F) and angiogenesis-associated genes (G) are down-regulated in TEP samples. \*\* $P$  < .01, \*\*\* $P$  < .001, \*\*\*\* $P$  < .0001.  $P$  values were calculated by student's  $t$ -test or Welch's  $t$ -test.

1032

1033 **Figure 3. Secretory factors from placental villi promote angiogenesis. (A)**  
 1034 Schematic workflow for sprouting angiogenesis assay. IP: intrauterine  
 1035 pregnancy (IP), AEP: abortive pregnancy, REP: ruptured pregnancy, CM:  
 1036 conditioned medium. (B-D) Secretory factors of the fetal part, not maternal part,  
 1037 from the maternal-fetal interface promotes sprouting of blood vessels *in vitro*.  
 1038 (B) CM from IP, but not EP, promotes the tubal formation of HUVECs. (C-D)  
 1039 Conditioned media were collected from fetal (placental villi) (C) or maternal  
 1040 (endometrium in the IP condition and fallopian tube wall in the AEP/REP  
 1041 condition) (D) and explants and tested for their angiogenic potential by  
 1042 sprouting assays. VEGF (250 ng/ml) serves as the positive control.  
 1043 Phalloidin/DAPI staining was employed to enhance the contrast.  
 1044 Representative images and the quantitative data of the number of sprouts per  
 1045 spheroid, as well as the mean/cumulative sprout length are shown. Each dot  
 1046 represents a field of view and values from fifteen independent fields of view  
 1047 are represented as mean  $\pm$  SD Scale bars, 100  $\mu$ m. \* $P$  < .05, \*\* $P$  < .01, \*\*\* $P$   
 1048 < .001, \*\*\*\* $P$  < .0001.  $P$  values were calculated by ANOVA, Tukey's test and  
 1049 student's  $t$ -test or Welch's  $t$ -test. NC: negative control, DCM: decidua  
 1050 conditioned medium, FCM: fallopian tubal conditioned medium.

1051

1052 **Figure 4. WNT2B activates VEGF and promotes angiogenesis. (A)**  
 1053 Components of WNT signaling pathway are down-regulated in TEP (n=5)  
 1054 placental villi as compared with IP (n=5) ones. Expression levels of  
 1055 WNT-related genes, as revealed by GSEA analysis, are retrieved from  
 1056 RNA-seq data, log-transformed, normalized, and presented as the heatmap.  
 1057 Data represents mean  $\pm$  SEM.  $P$  values were calculated by student's  $t$ -test or  
 1058 Welch's  $t$ -test. (B-C) Conditioned media from IP and REP placental villi  
 1059 explants promote angiogenesis in a WNT-dependent manner. In sprouting

angiogenesis assay, conditioned media from three types of pregnancies were co-treated with various inhibitors antagonizing different components of canonical WNT signaling pathway, such as ICG-001 (10  $\mu$ M) (B) or sFRP-1 (5  $\mu$ g/ml) (C). The number of sprouts per spheroid and the cumulative sprout length indicate that WNT inhibitors greatly abolish pro-angiogenic effects of conditioned media from IP and REP villous explants. (D) Absence of VEGF protein in conditioned media (CM) from IP (n=9) and TEP (n=9) placental villi as detected by ELISA assay. (E) Real-time qPCR analysis of all 19 human WNT ligands in IP (n=7) compared to AEP (n=7) and REP (n=7). Data represents mean  $\pm$  SEM. (F) Upper, WNT2B protein level in the CM from the IP (n=10), AEP (n=7), and REP (n=7) placental villi, as detected by ELISA assay. Lower, WNT2 protein level in the CM from the IP (n=5) and TEP (n=5) placental villi, as detected by ELISA assay. (G) WNT2B's pro-angiogenic activity is dependent on WNT signaling. In sprouting angiogenesis, capillary-like sprouts after 24 h stimulation of WNT2B conditioned medium with and without co-treatment of WIF-1 (2.5  $\mu$ g/ml) or sFRP-1 (5  $\mu$ g/ml) were imaged and quantified. The statistical data of number of sprouts per spheroid and cumulative sprout length indicates that sFRP-1 and WIF-1 significantly reduces the pro-angiogenic effects of WNT2B. (H) Treatment of HUVECs with WNT2B or GSK3 inhibitor CHIR99021 activates the expression of VEGF. Data represents mean  $\pm$  SEM. *P* values were calculated by student's *t*-test or Welch's *t*-test. Data represents mean  $\pm$  SEM. *P* values were calculated by ANOVA, Tukey's test. Data represents mean  $\pm$  SD. Scale bars, 100  $\mu$ m. \**P* < .05, \*\**P* < .01, \*\*\**P* < .001, \*\*\*\**P* < .0001. *P* values were calculated by ANOVA, Tukey's test and student's *t*-test or Welch's *t*-test. NC: negative control.

**Figure 5. WNT2B promotes blood vessel development on multiple layers.**

(A) Human embryonic stem cells (hESCs) with ETV2 and rtTA knockin were treated with 2  $\mu$ g/ml doxycycline for 48 hrs, followed by CD31 staining to examine the endothelial cell fate transition. ICG-001 treatment exhibits pronounced inhibitory effect on endothelial cell transdifferentiation and survival. Scale bars, 100  $\mu$ m. (B) WNT antagonists ICG-001 (10  $\mu$ M) and XAV-939 (4  $\mu$ M) block VEGF-induced sprout formation of HUVECs. (C) Formation of blood vessel organoids were significantly blocked by ICG-001 treatment as evident by decreased sizes of organoids. (D) ICG-001 significantly blocked VEGF-induced vascular network formation of HUVECs in microfluid chip assays. (E) WNT2B promotes the differentiation of hESCs towards endothelial cell fate. 2  $\mu$ g/ml doxycycline (Dox) were added to the culture medium to induce ETV2 expression in hESCs with 1:1 mixture of conditioned medium in the absence (WNT2B<sup>-</sup>) or presence (WNT2B<sup>+</sup>) of WNT2B for three days. Endothelial differentiation was confirmed by CD31 staining. (F-H) WNT2B promotes vascular specification and vascular network development in blood vessel organoids. WNT2B-conditioned and control media were supplemented with differentiation factors and added at the time cell aggregates were embedded in 3D gel matrices and differentiated for 5 days for sprout measurement (F). Cell aggregates primed for EC specification were then transferred to suspension culture for further differentiation to examine the vascular network formation by CD31 immunostaining (G, H). Scale bars, 100  $\mu$ m. Data represents mean  $\pm$  SD. \* $P$  < .05, \*\* $P$  < .01, \*\*\* $P$  < .001, \*\*\*\* $P$  < .0001.  $P$  values were calculated by ANOVA, Tukey's test. NC, negative control. CM, conditioned medium.

**Figure 6. WNT2B are secreted from syncytiotrophoblasts in placental villi.**

(A-C) Comparison of trophoblasts in IP, AEP, and REP pregnancies. (A) H&E

1115 staining of placental villi cross sections from three types of pregnancies. Two  
 1116 clinical samples are shown for each type of pregnancy. Arrows, blood vessels.  
 1117 Scale bars, 100  $\mu$ m. (B) Representative images of immunostaining of the  
 1118 trophoblast marker CK7, STB marker SDC1, vCTB marker TEAD4, and  
 1119 proliferative marker Ki67 in placental villi of three pregnancies. Similar  
 1120 extracellular and intracellular patterns of SDC1 and similar number and  
 1121 arrangement of proliferative and non-proliferative vCTBs were observed in  
 1122 three types of pregnancy. Scale bars, 100  $\mu$ m. (C) Left, quantification of the  
 1123 mean cross area of proliferative vCTBs of villi from IP (n=8), AEP (n=5) and  
 1124 REP (n=6). For each sample, data was collected from at least eight  
 1125 independent fields of views. The graph shows the mean  $\pm$  SEM. Right,  
 1126 quantification of the ratio of proliferative vCTBs of villi from IP (n=2), AEP (n=2)  
 1127 and REP (n=2). Similar proliferation activities of the stem cell population were  
 1128 observed in three types of placental villi. (D) Expression of trophoblast-specific  
 1129 genes in IP (n=5) and TEP (n=5) placental villi suggests minor differences in  
 1130 CTB and STB marker expression, but significant upregulation of EVT markers  
 1131 in the TEP condition. Log-transformed, normalized expression levels for  
 1132 selected typic markers of three trophoblast subsets are presented as mean  $\pm$   
 1133 SEM.  $**P < .01$ ,  $***P < .001$ ,  $****P < .0001$ .  $P$  values were calculated by  
 1134 student's  $t$ -test or Welch's  $t$ -test. (E) WNT2B is produced by trophoblasts of IP  
 1135 and REP placental villi, not AEP ones, as revealed by immunohistochemical  
 1136 staining for WNT2B. Two clinical samples (#1 and #2) for each type of  
 1137 pregnancy were presented. Red rectangle, trophoblasts. Green rectangle,  
 1138 blood vessels. Triangles, vCTB. Circles, STB. Scale bars, 100  $\mu$ m.

1139

1140 **Figure 7. The organoid coculture model revealed the role of WNT2B in**  
 1141 **human vascularization.** (A) Schematic illustration of the coculture system  
 1142 containing trophoblast organoids (TOs) and blood vessel organoids (BVOs).



1143 Trophoblast organoids were formed in the presence of cell aggregates  
 1144 containing specified endothelial cells/projectors. Matured trophoblast  
 1145 organoids were then transferred and cocultured with another set of cell  
 1146 aggregates to investigate the influence of TOs on BVO development. (B) Two  
 1147 independent trophoblast stem cell lines derived from human blastocysts  
 1148 exhibited normal trophoblast stem cell morphologies. Scale bars, 100  $\mu$ m. (C)  
 1149 Morphologies of TOs formed in the coculture system, in which WNT2B was  
 1150 significantly knocked down by shRNAs (D). Scale bars, 50  $\mu$ m. (E) TOs  
 1151 significantly promoted the development of BVOs in a WNT2B-dependent  
 1152 manner. CD31 immunostaining (left) and statistics (right) of the sprouts of BVO  
 1153 after coculturing with Matrigel alone or TO for 3 days. Scale bars, 100  $\mu$ m. (F)  
 1154 The schematic illustration and summary of three pregnancy types of villi and  
 1155 intravillous capillaries. Data represents mean  $\pm$  SD. \* $P$  < .05, \*\* $P$  < .01, \*\*\* $P$   
 1156 < .001, \*\*\*\* $P$  < .0001.  $P$  values were calculated by ANOVA, Tukey's test.

1157

1158

# Figure 1

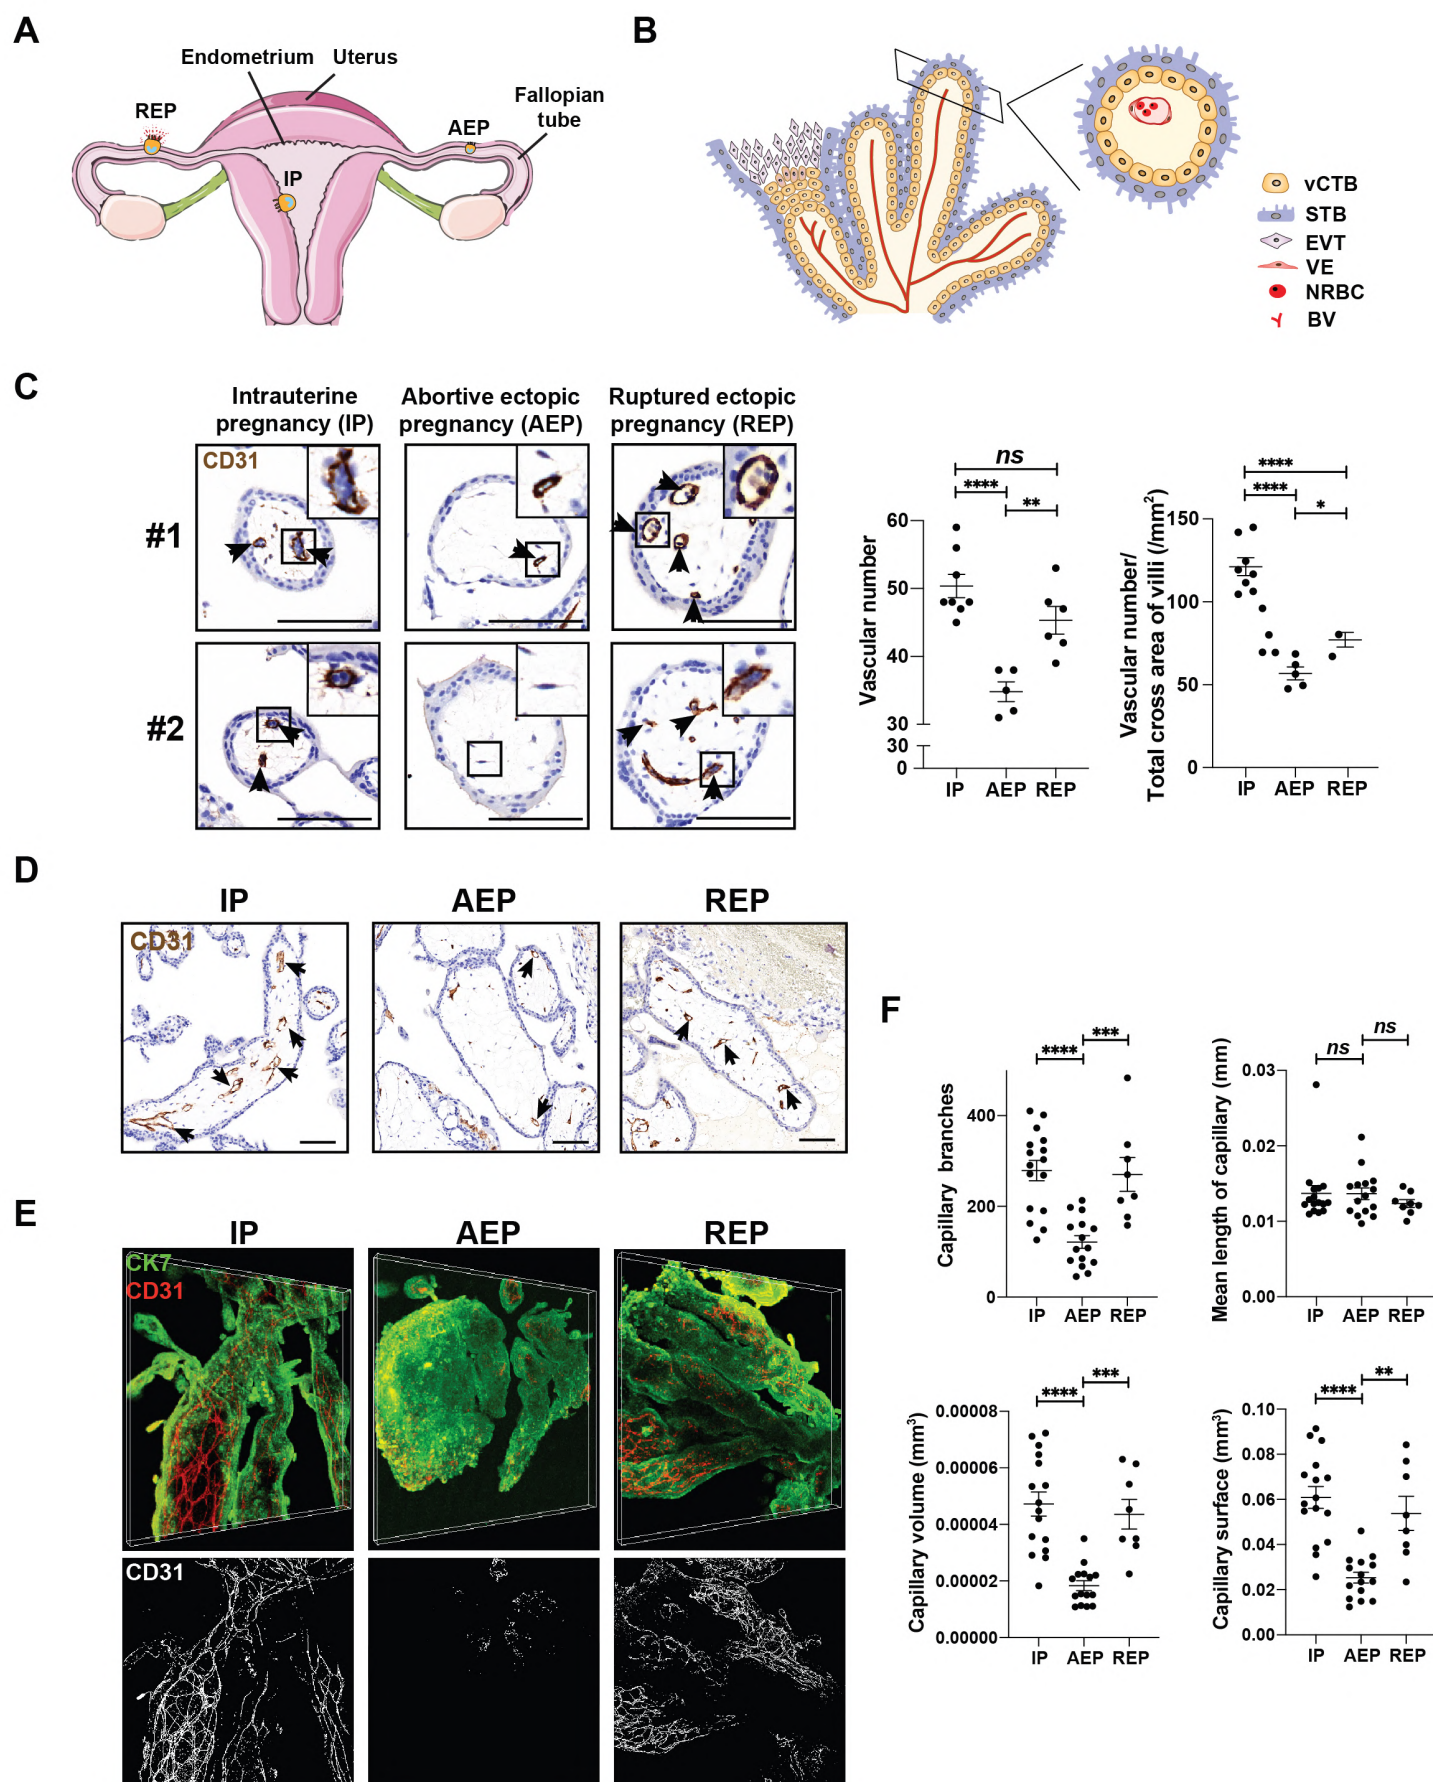

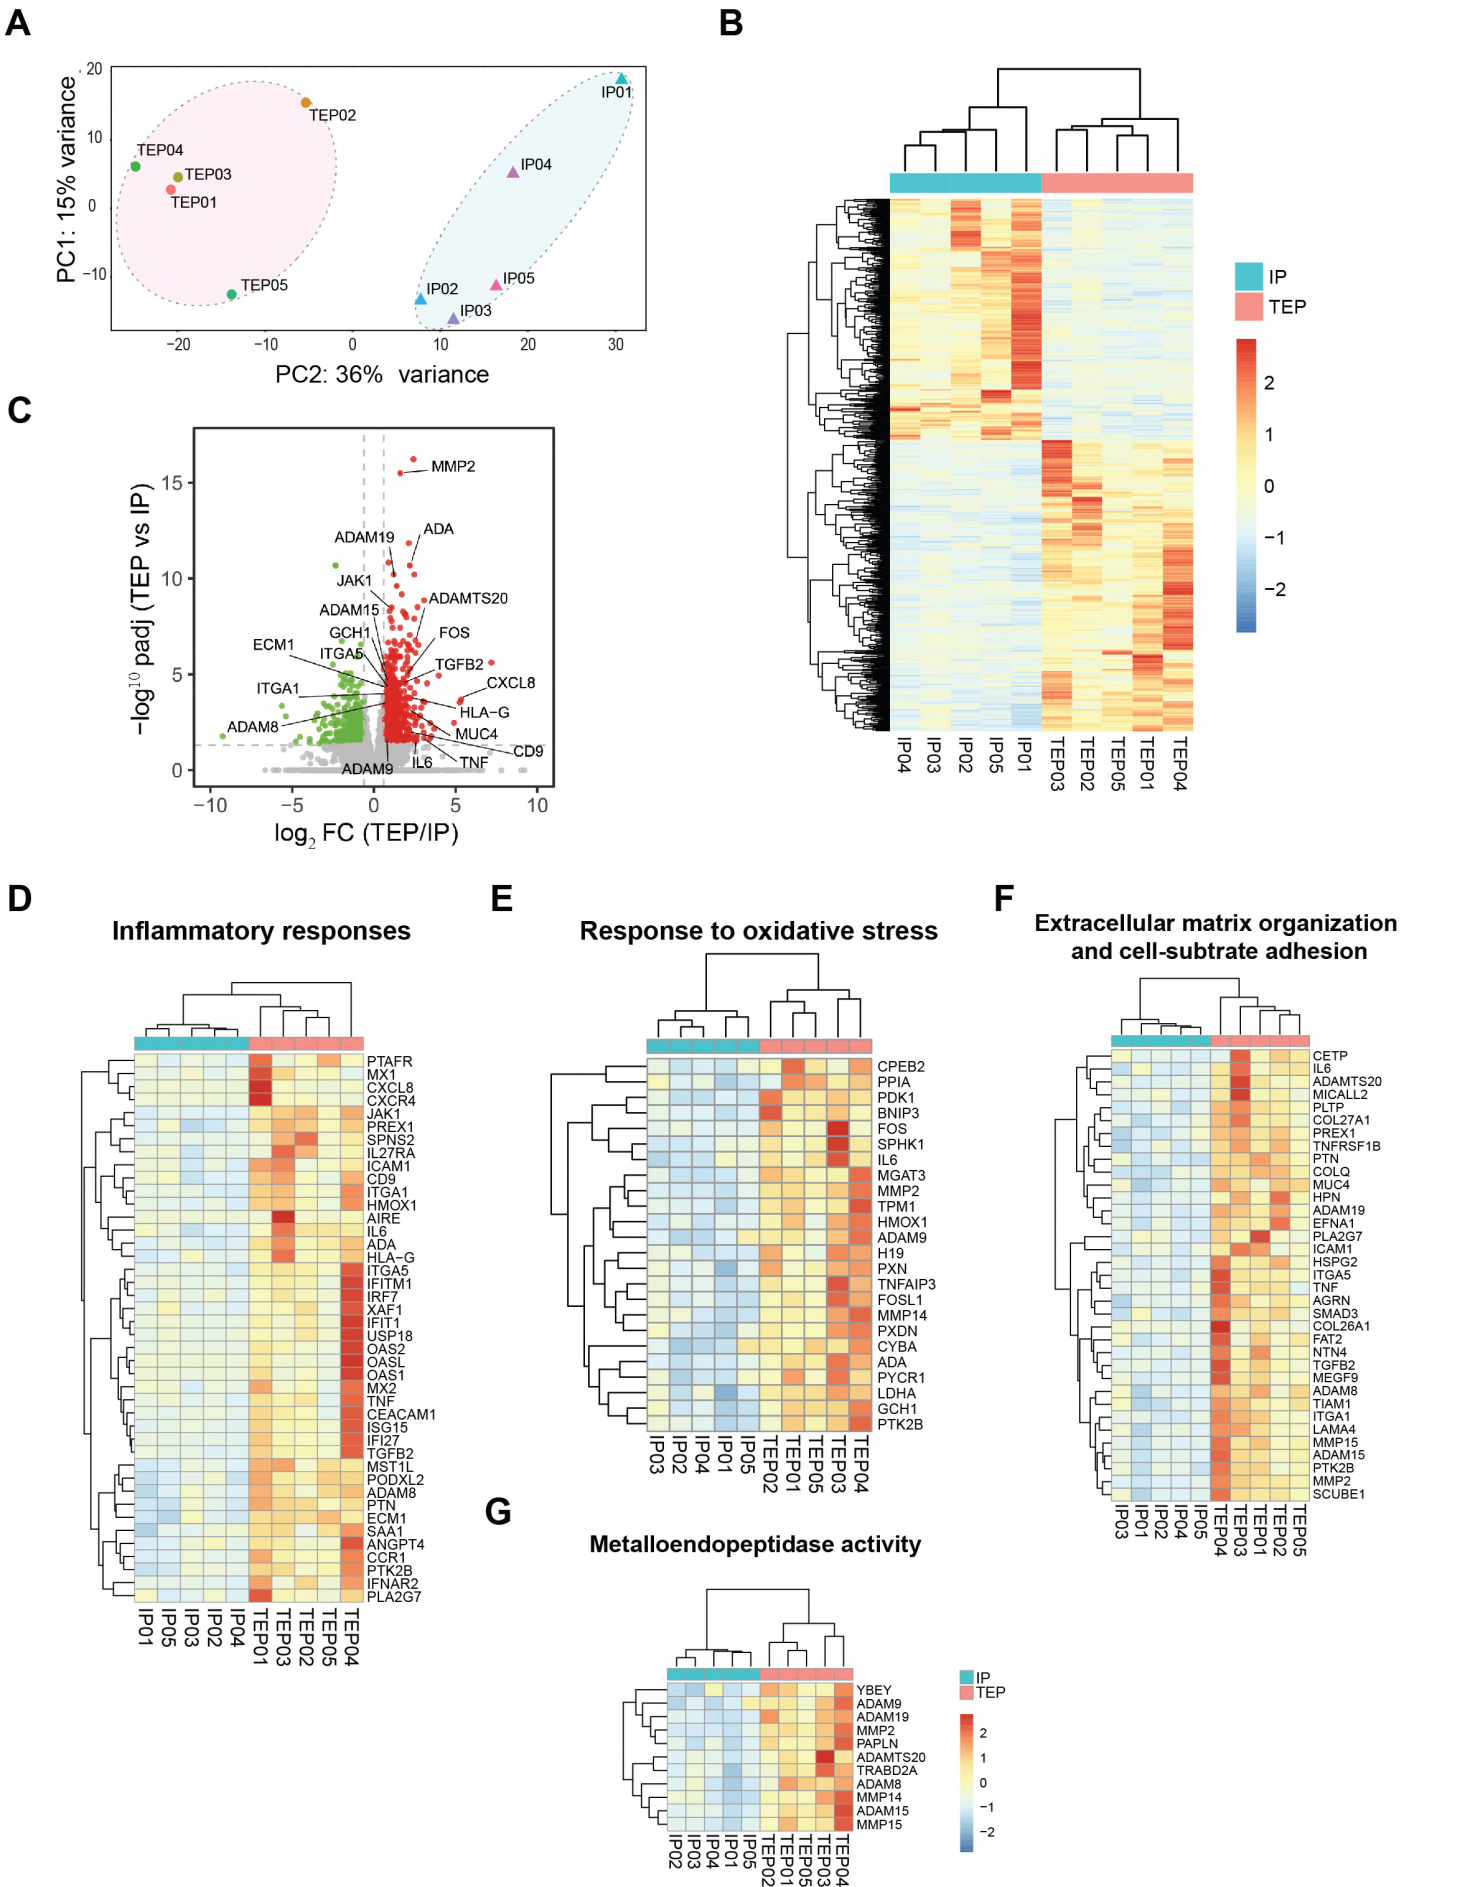

G

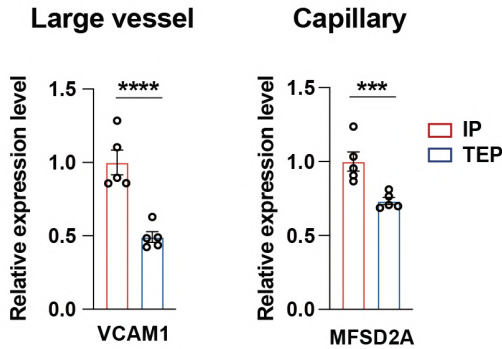

H

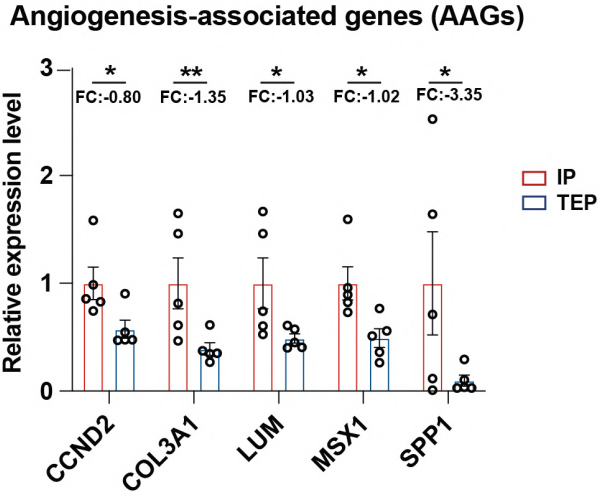



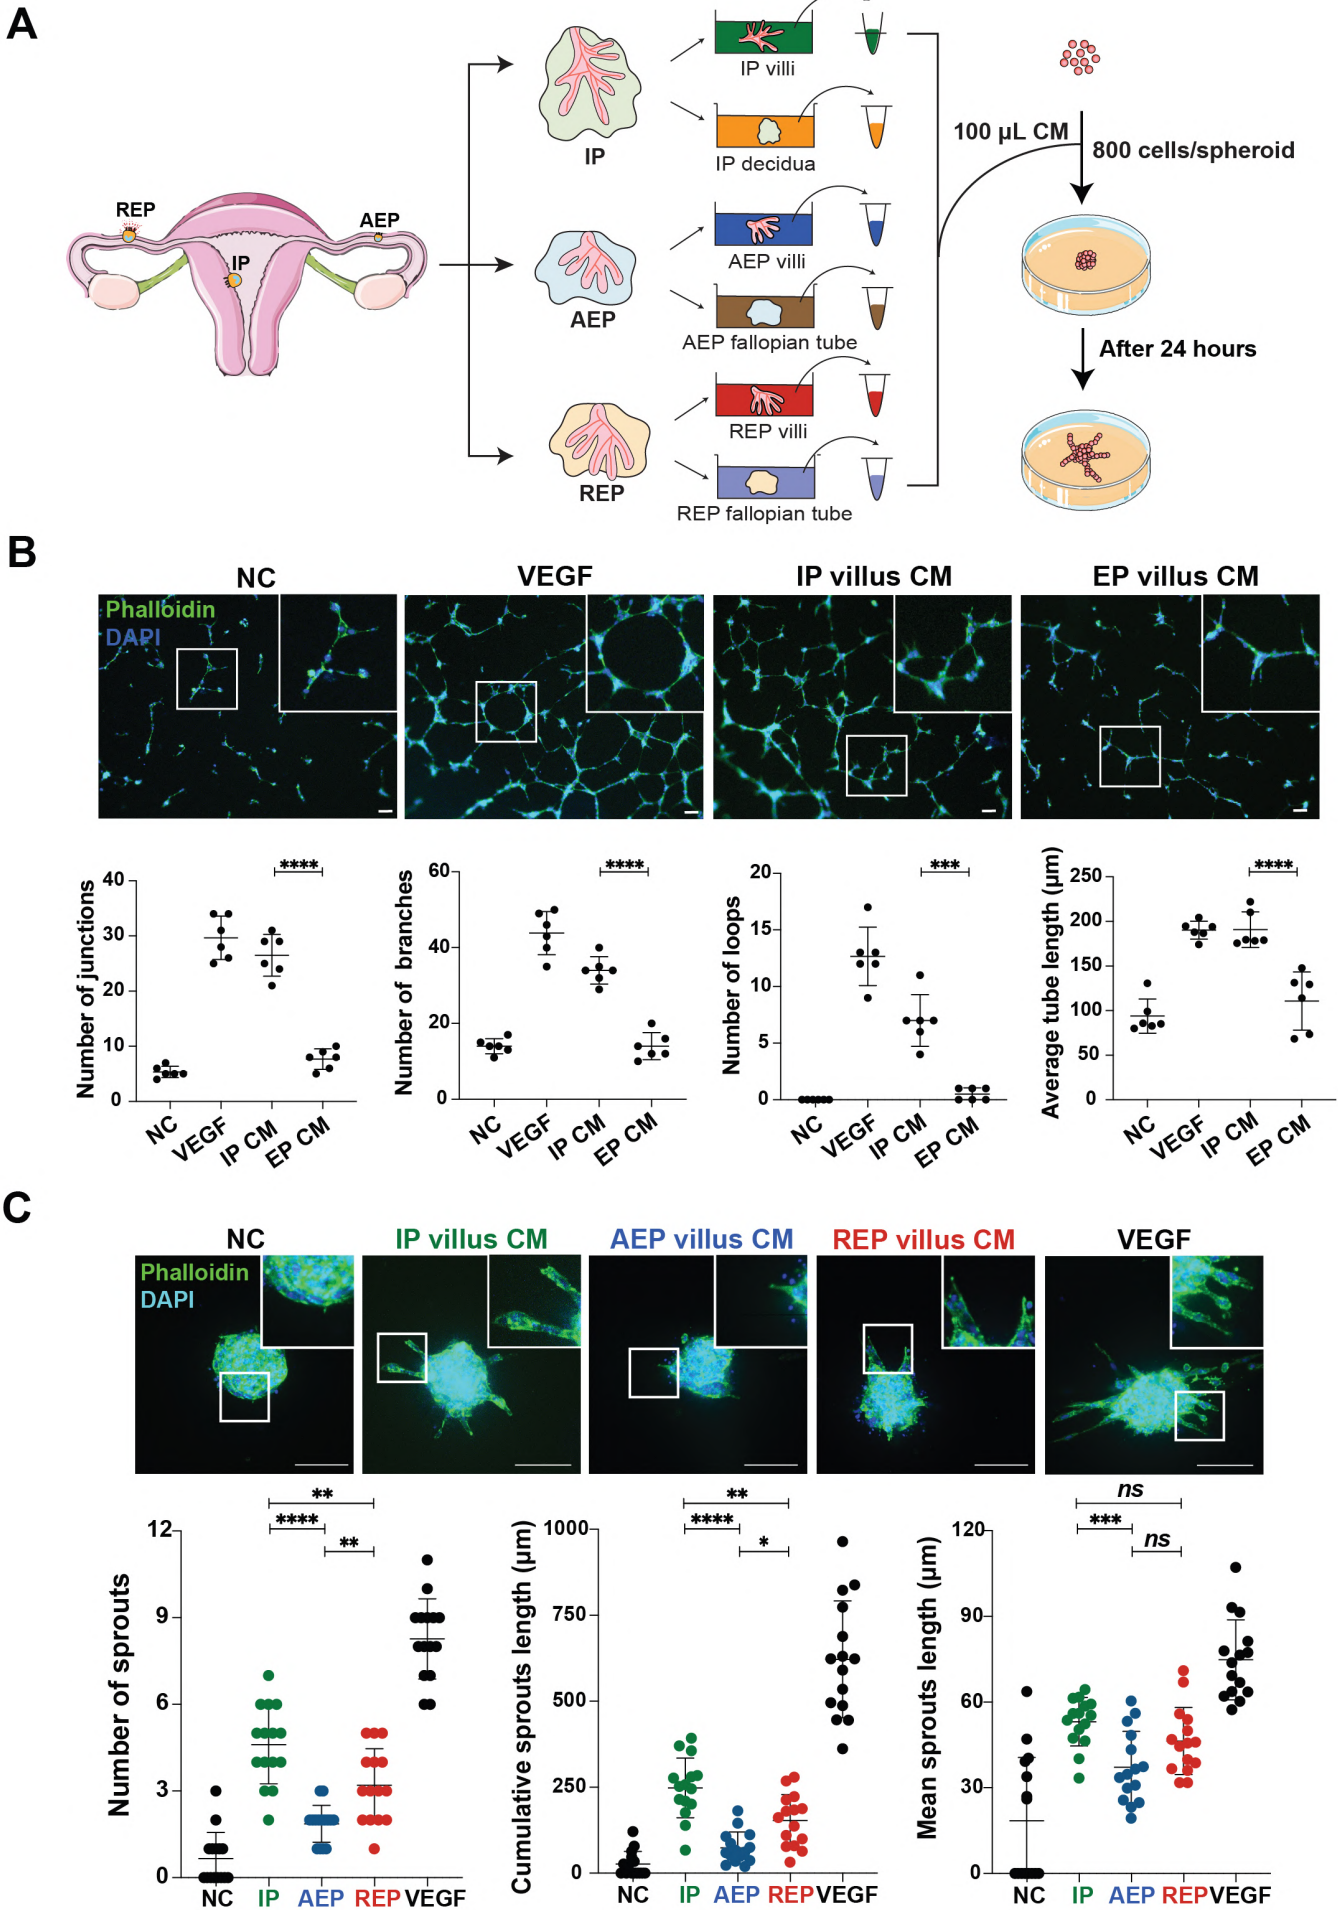

# D

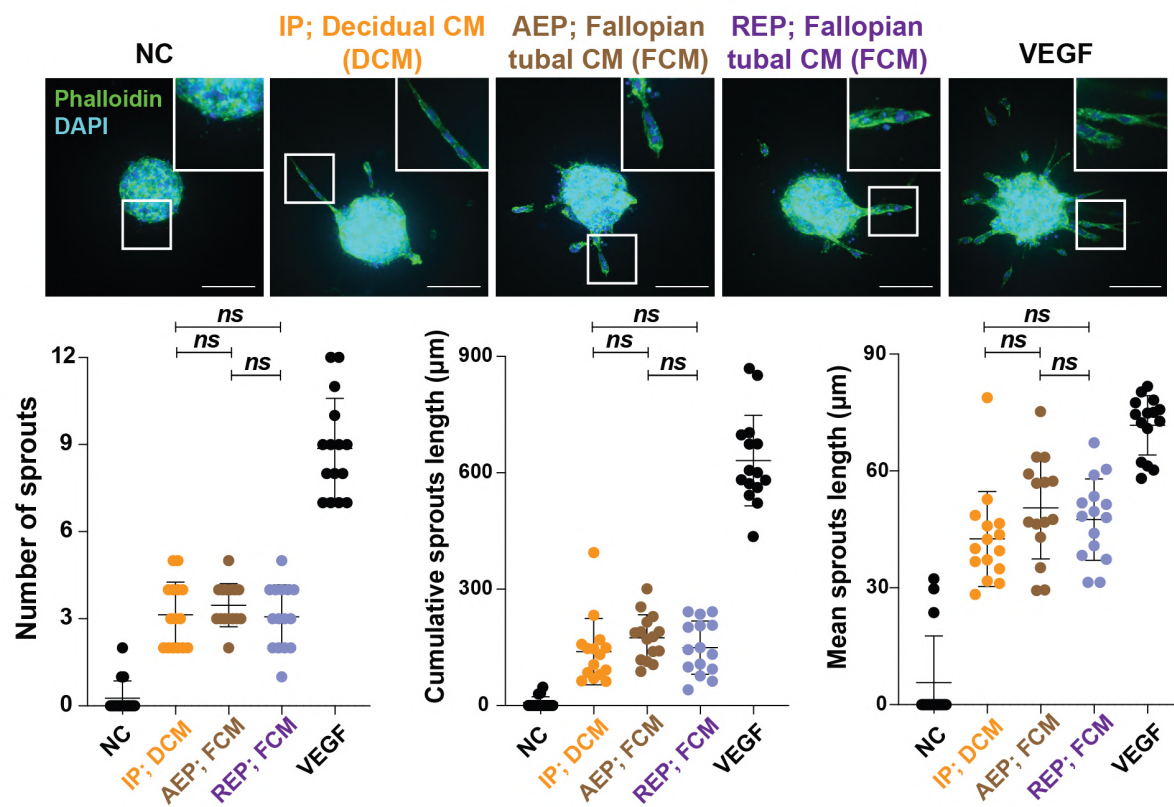

# Figure 4

A

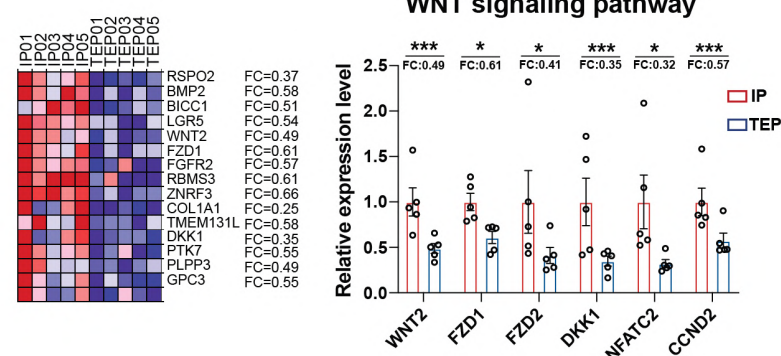

D

## VEGF ELISA standard curve

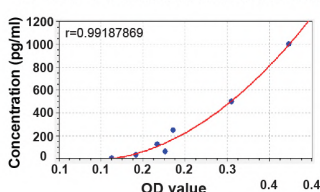

## VEGF ELISA

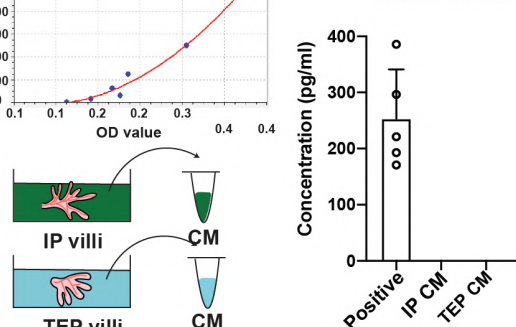

B

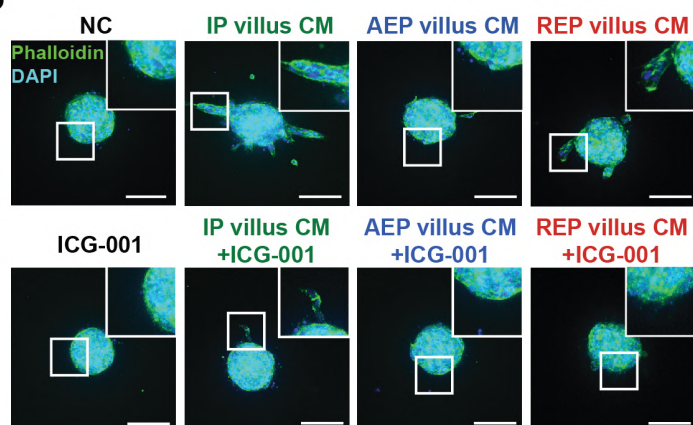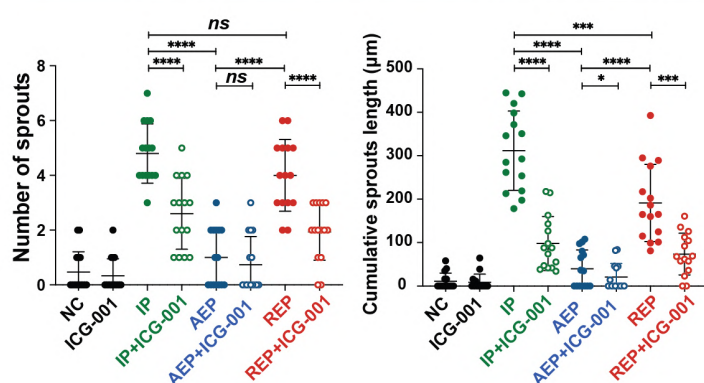

C

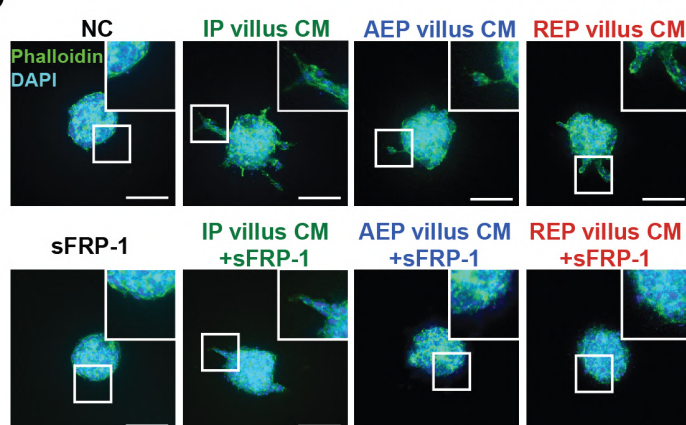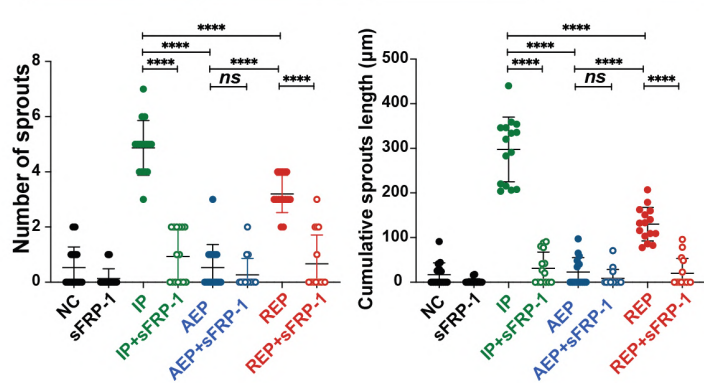

E

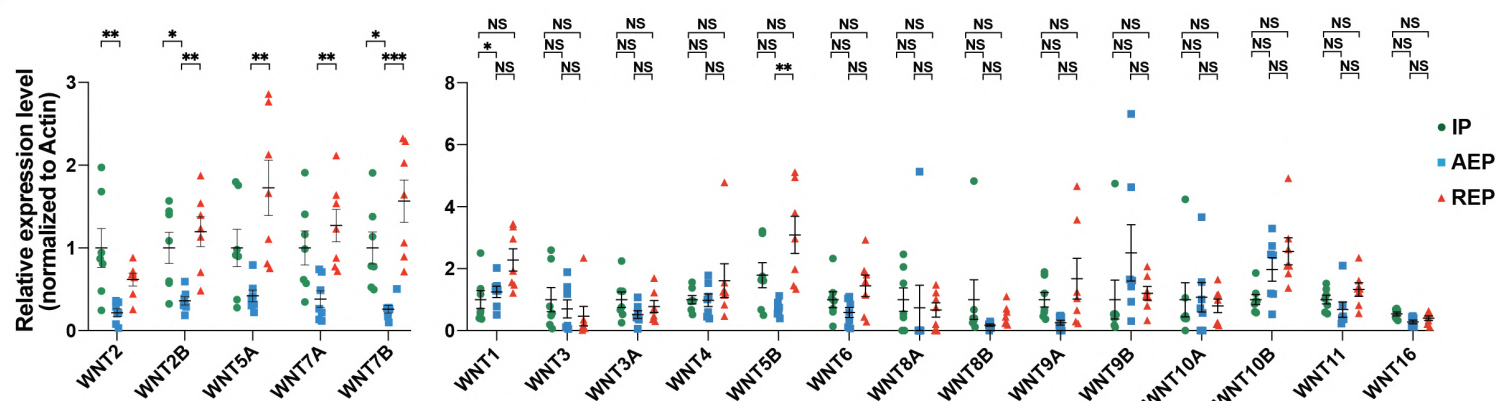



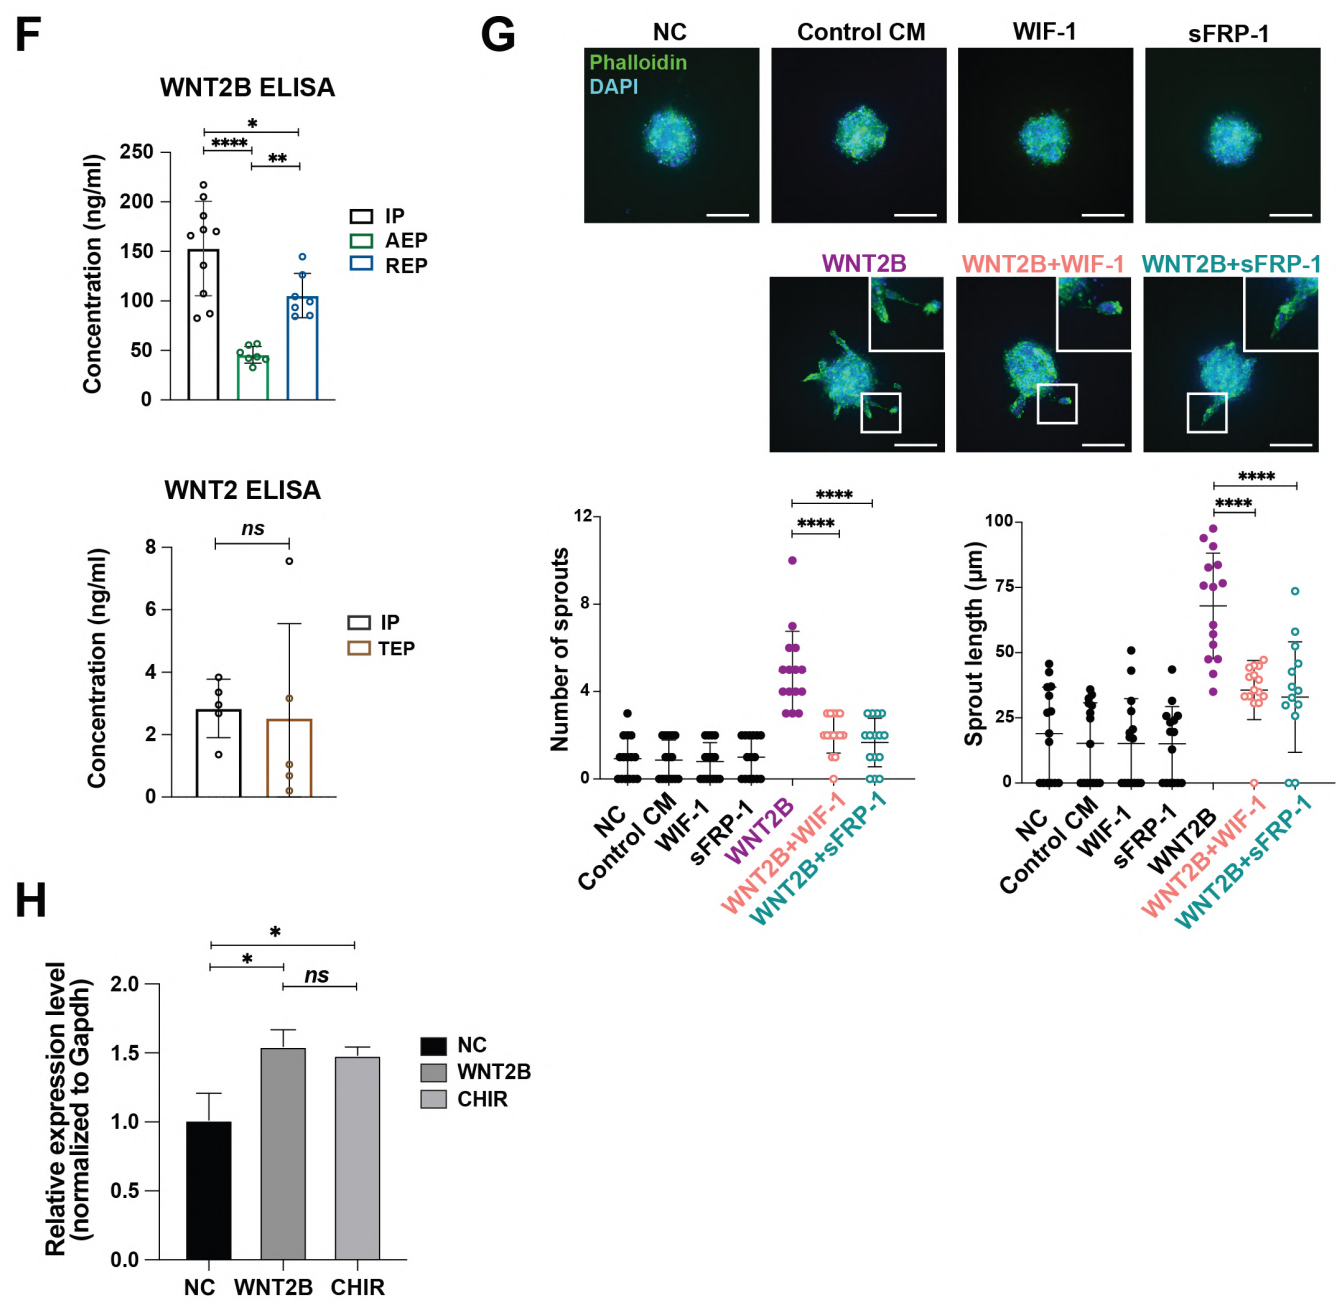



**Figure 5** bioRxiv preprint doi: <https://doi.org/10.1101/2022.04.18.488605>; this version posted April 18, 2022. The copyright holder for this preprint (which was not certified by peer review) is the author/funder. All rights reserved. No reuse allowed without permission.

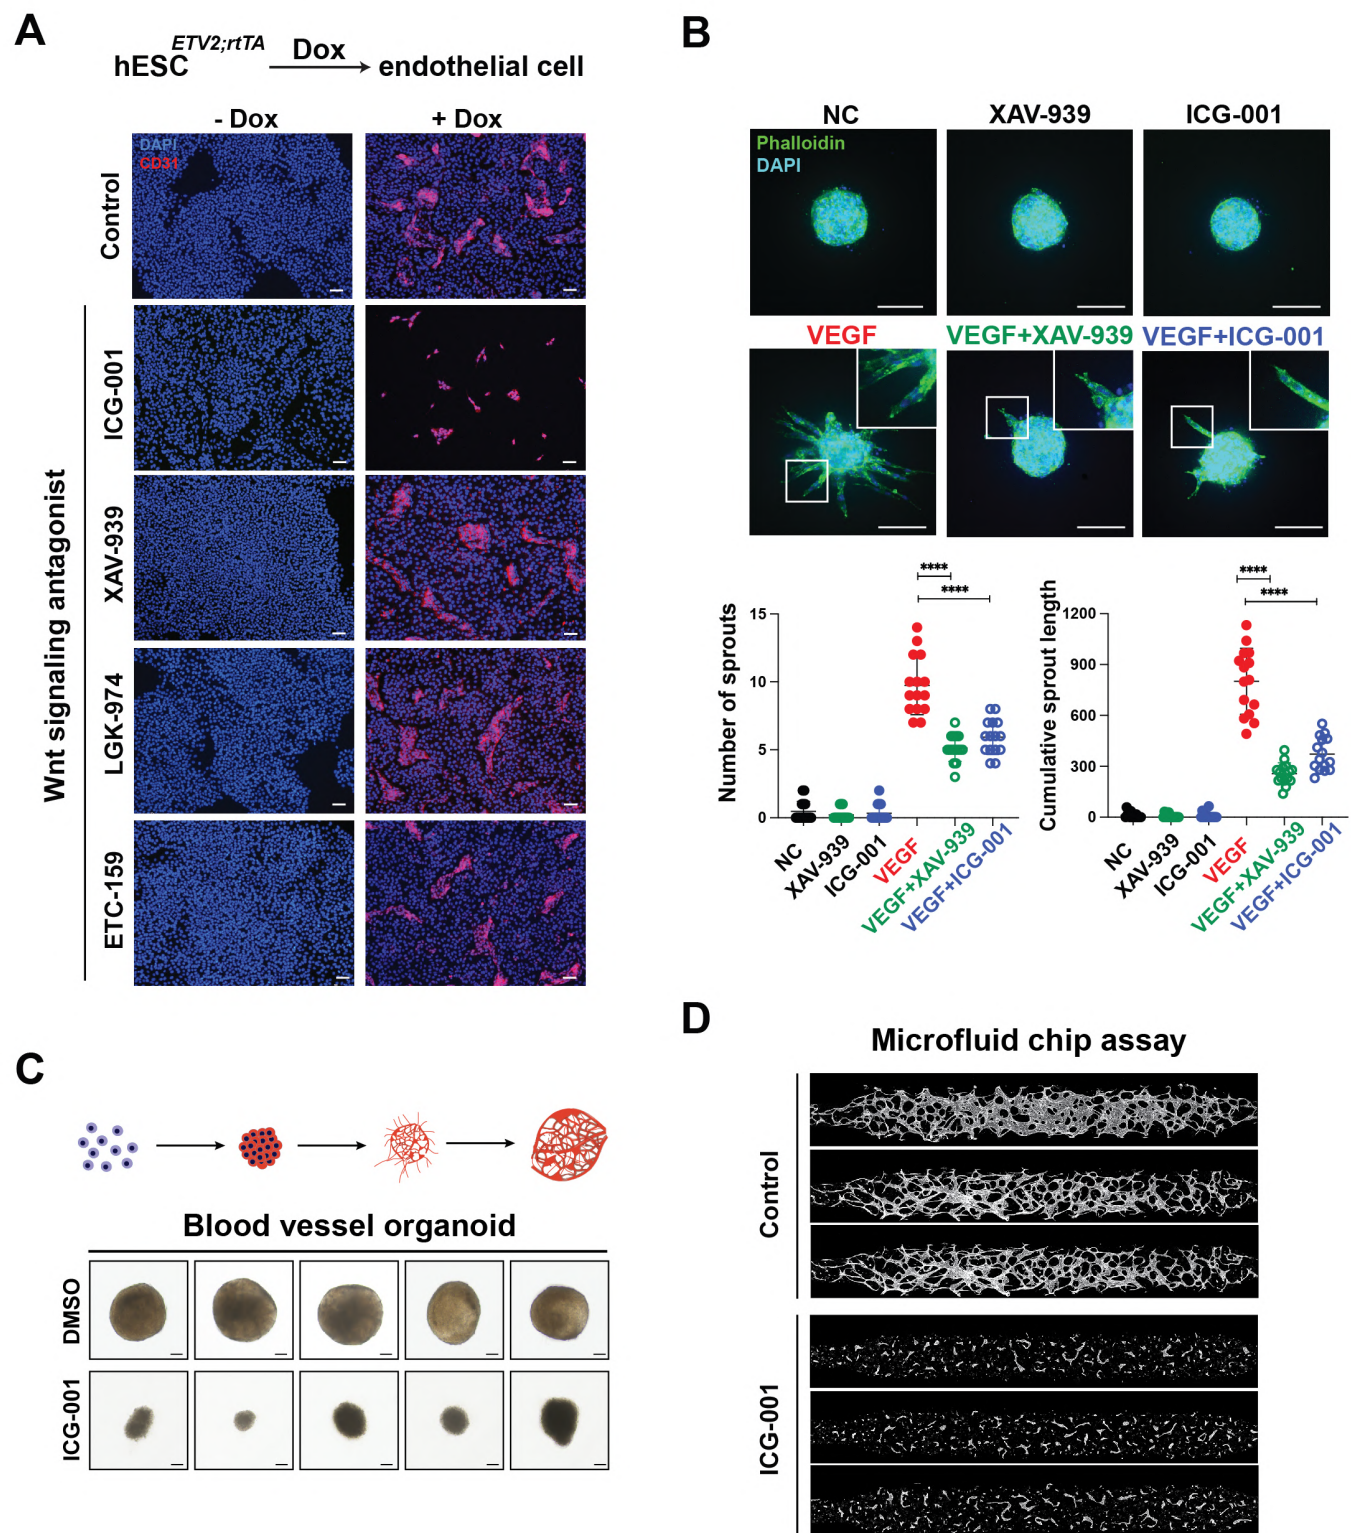

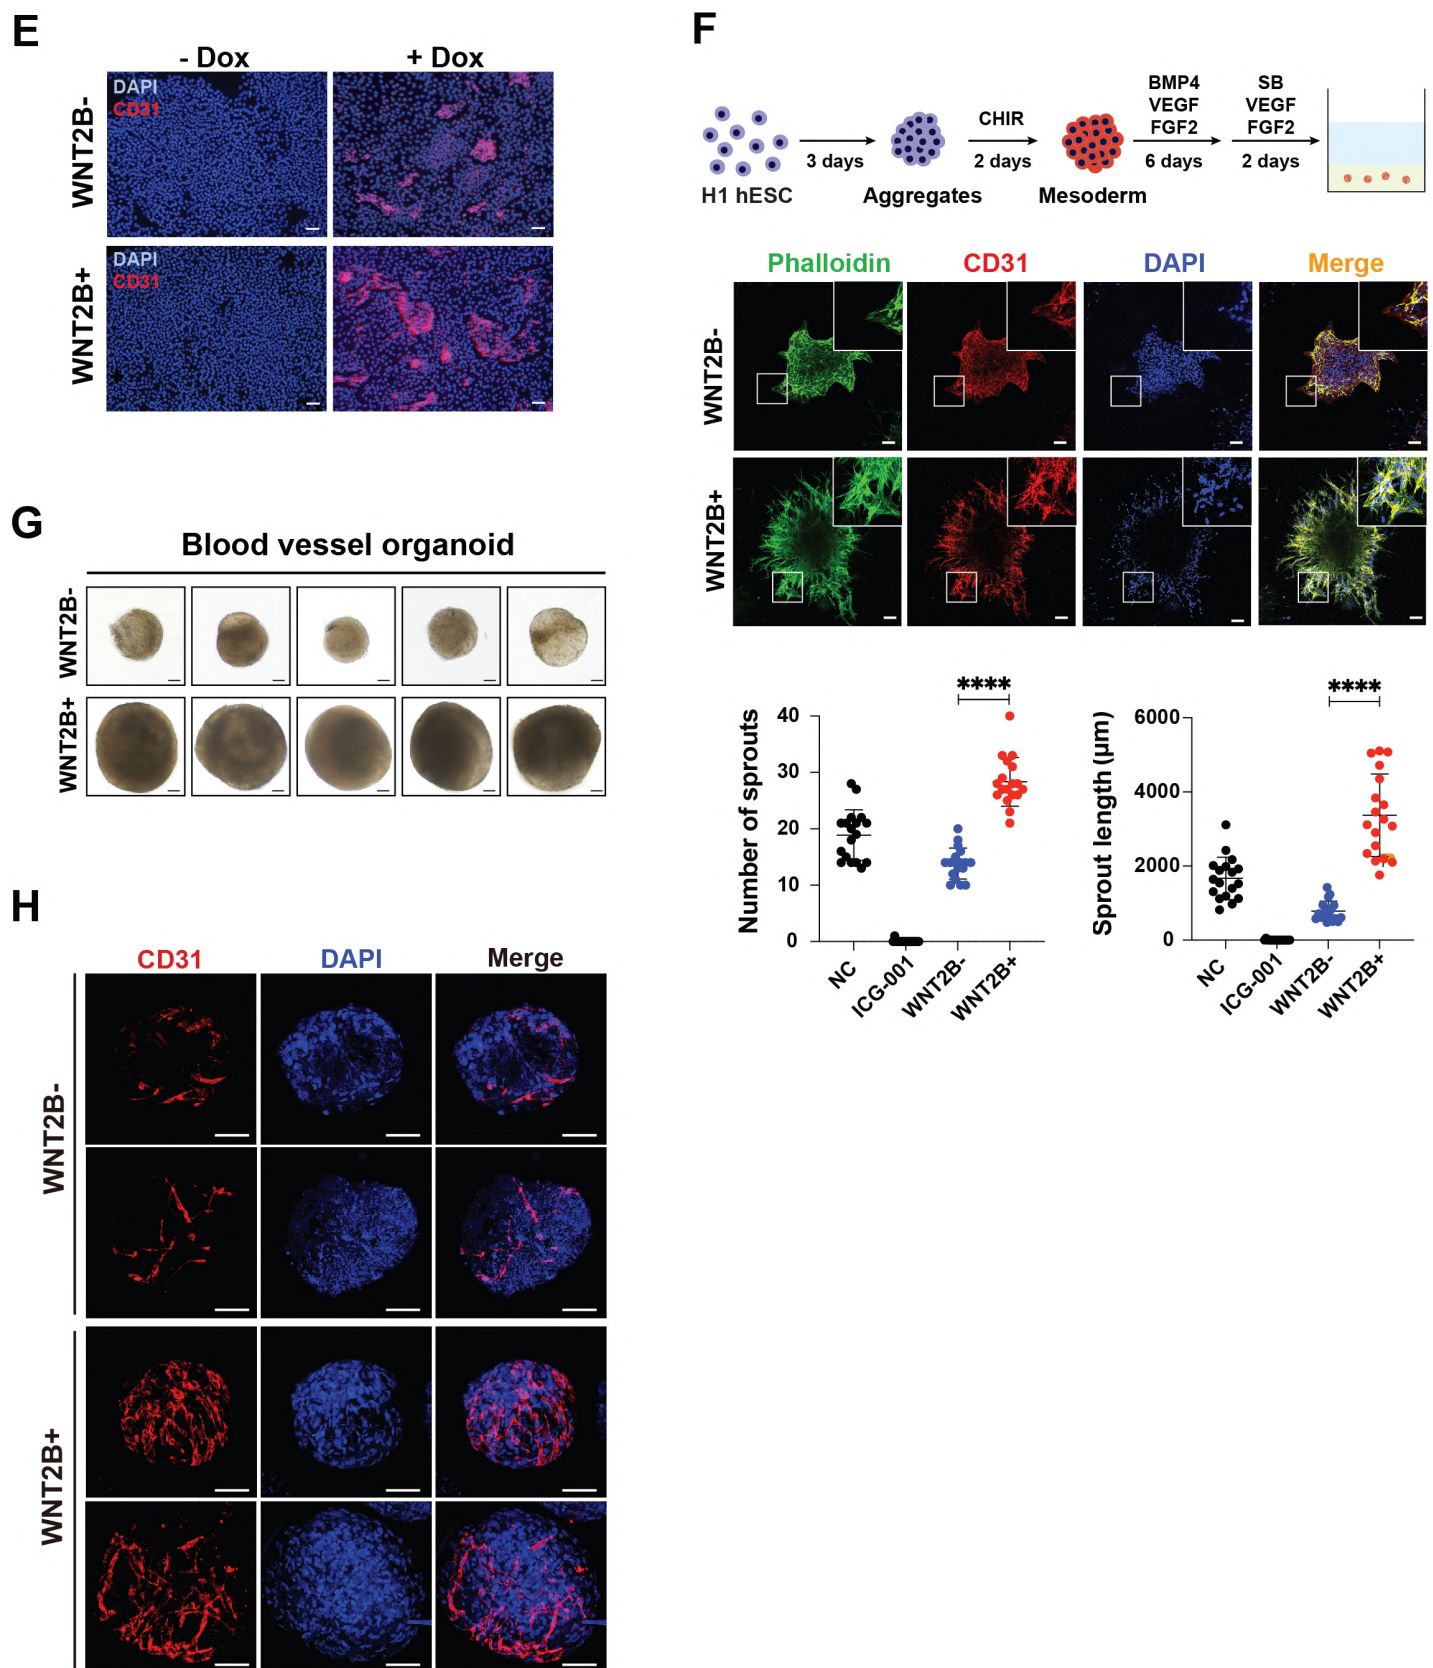



# Figure 6

bioRxiv preprint doi: <https://doi.org/10.1101/2022.04.18.488605>; this version posted April 18, 2022. The copyright holder for this preprint (which was not certified by peer review) is the author/funder. All rights reserved. No reuse allowed without permission.

**A**

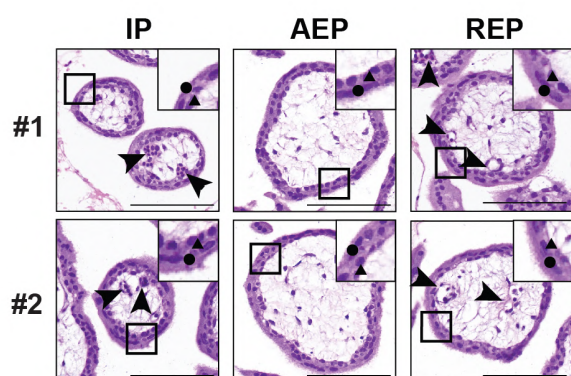

**B**

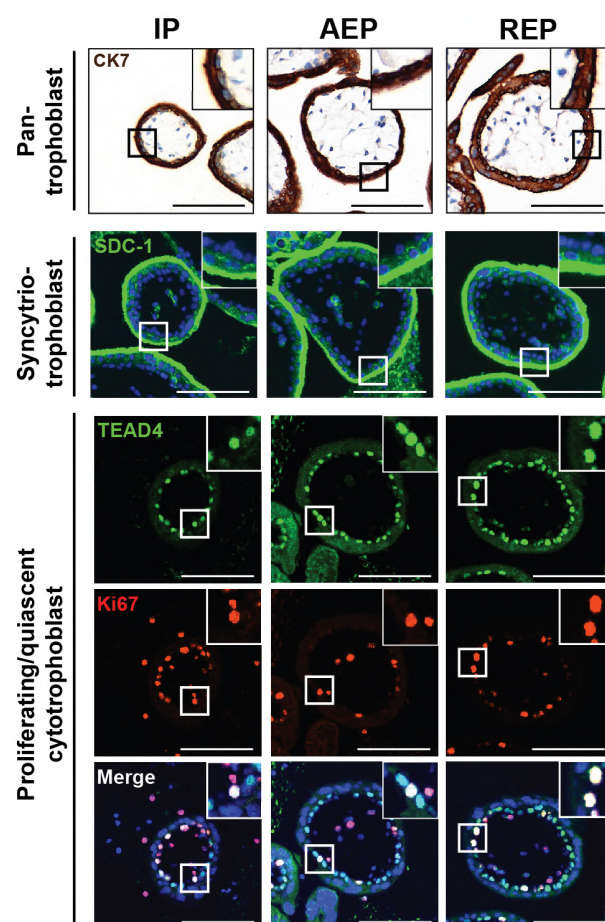

**C**

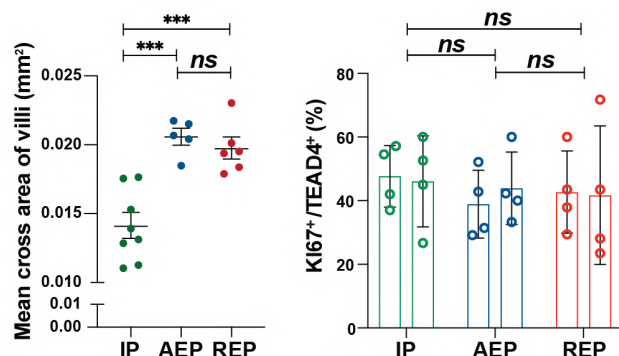

**D**

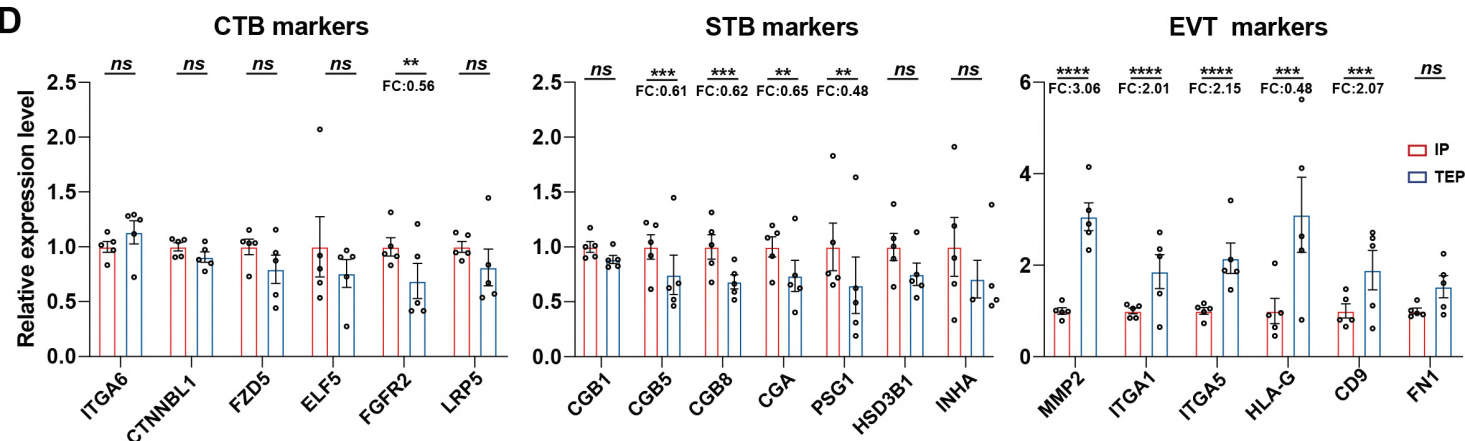

**E**

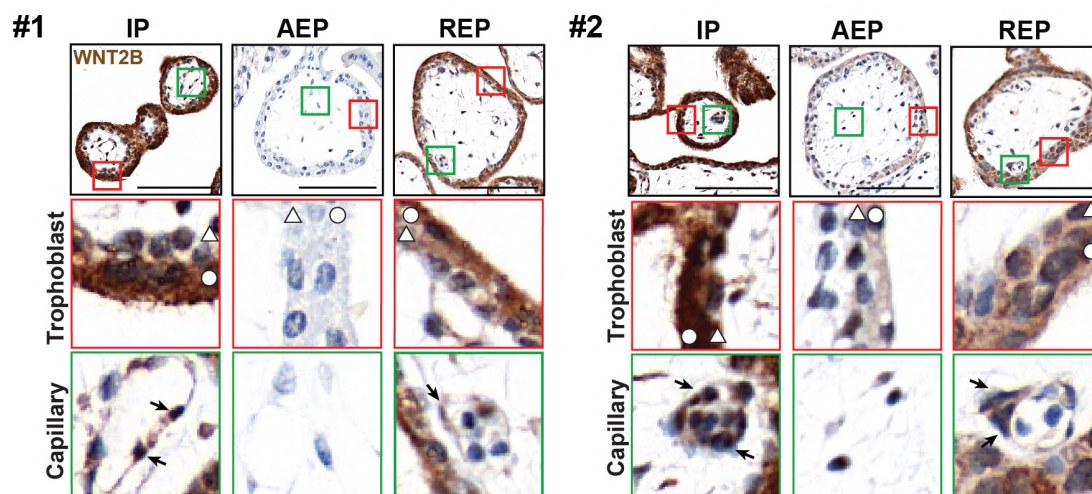



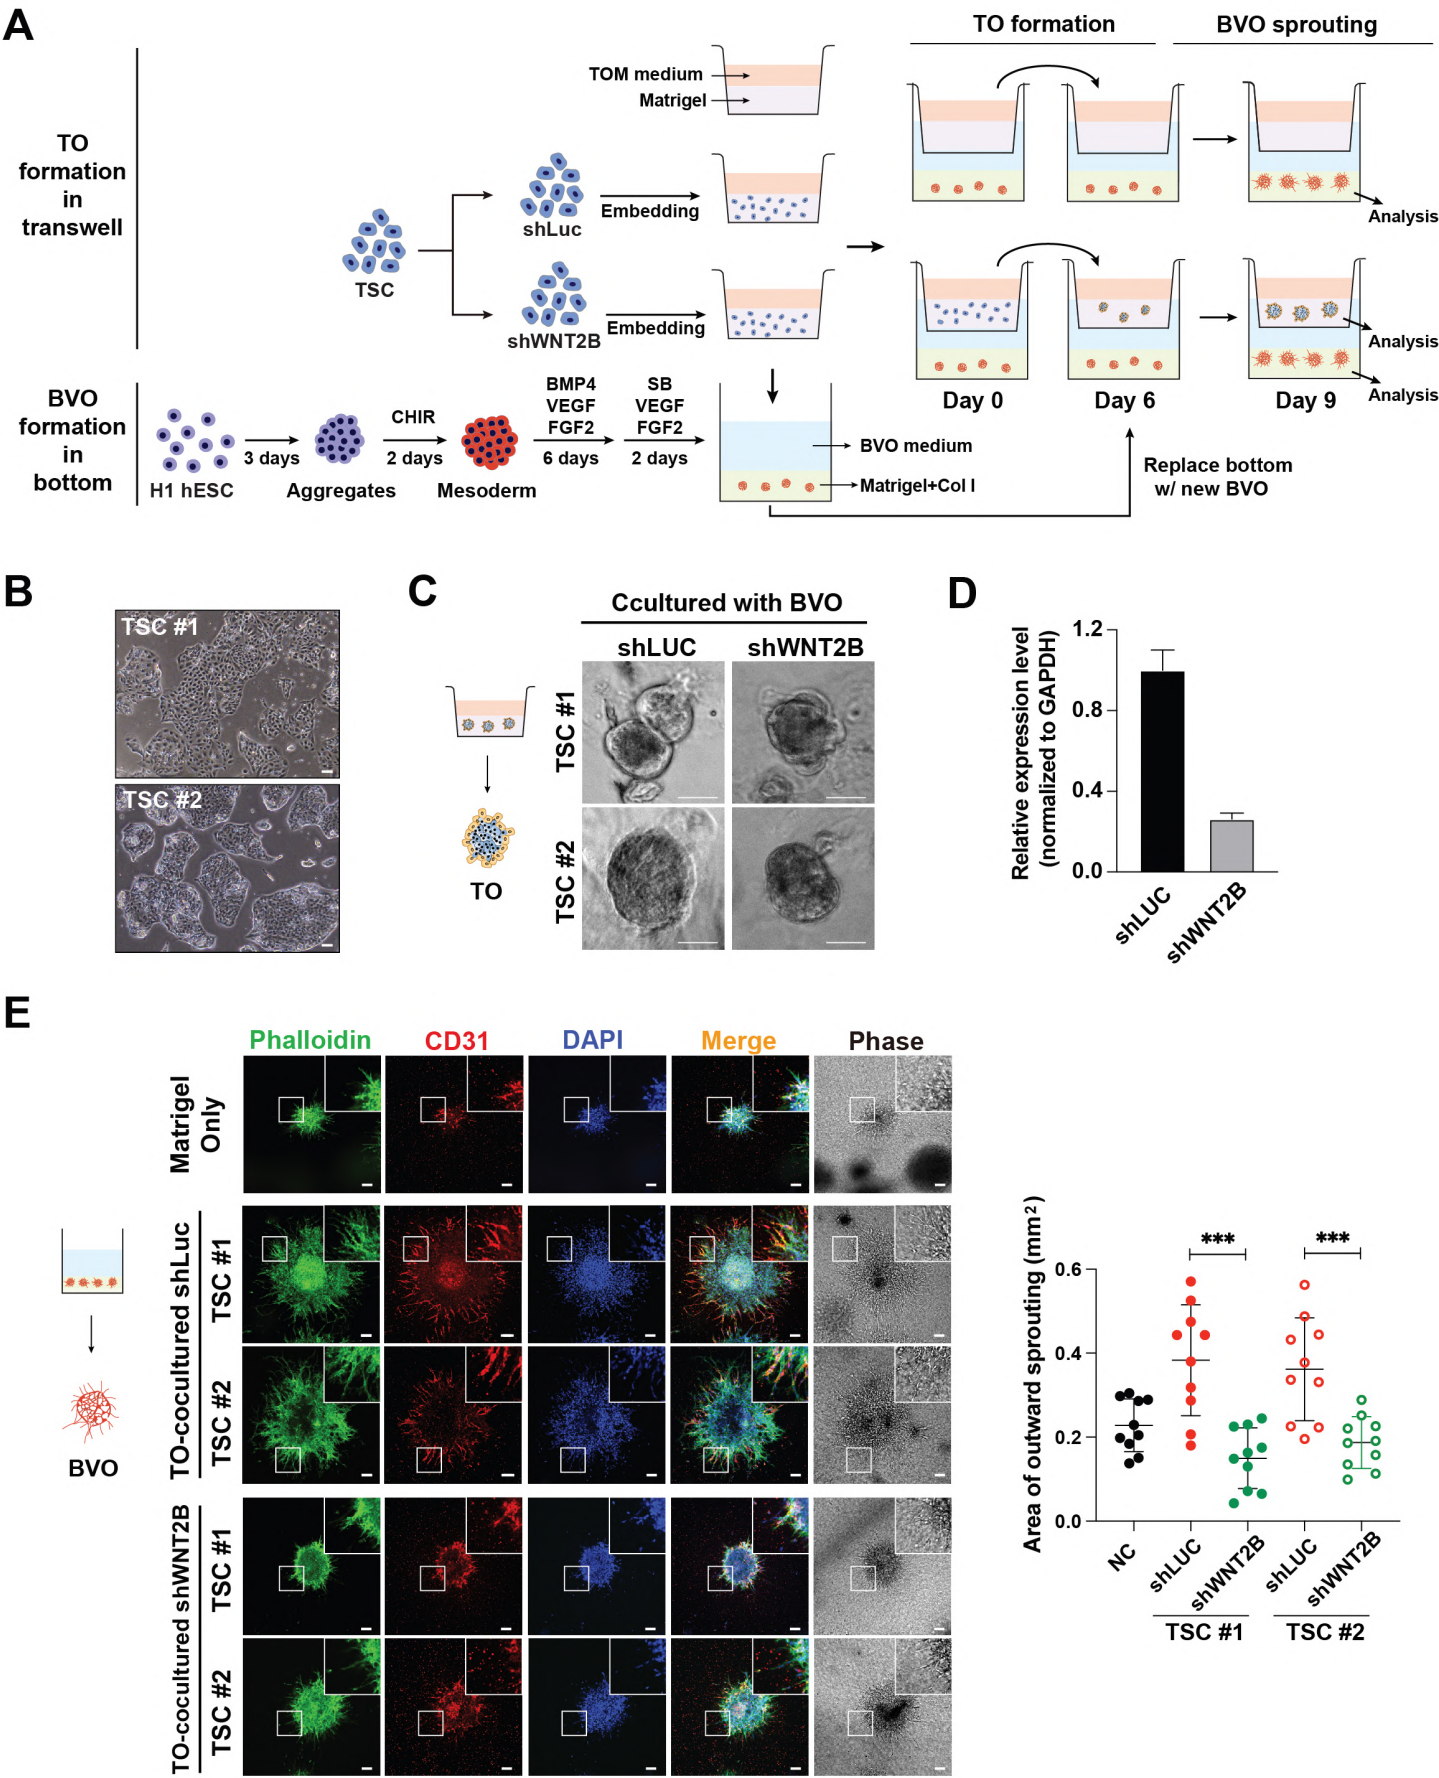

**F**

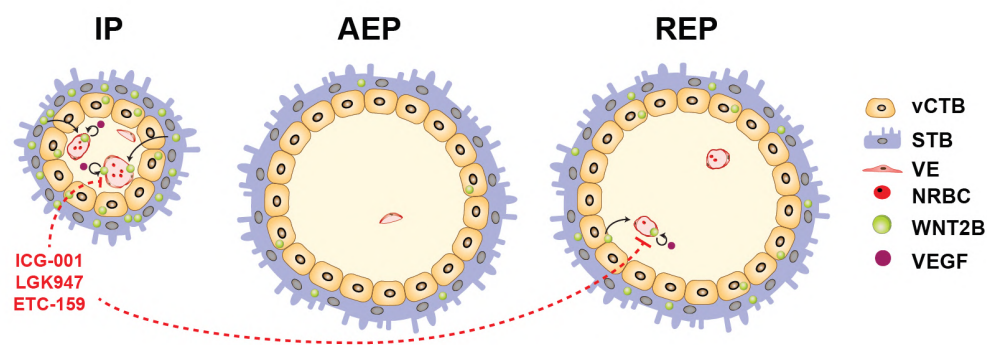

Source: http://biorxiv.org/content/10.1101/2022.04.18.488605v1.full.pdf
